# Supplementary material
Source: Research Square preprint supplement (doi:10.21203/rs.3.rs-9503746/v1)
Supplement: Supplementary file 1 [file d763b69f2300462f95b1cd5e.xlsx]

## Sheet: isav-tot_table
										RT-qPCR		dPCR
case	sample.id	sample.type	position	depth	phase	transport	phase.dscrp.	RNA (ng/µL)	cDNA (ng/µL)	ISA Ct	ISA (ng/µL cDNA)	ISA.8 (cp/µL RNA)	HPR0 (cp/µL RNA)	HPRΔ (cp/µL RNA)
Case A	RS005	Well biofilm	-	-	P1	Delivery 1	Before transport	7.4	0.444	0	0	0	0	0
Case A	RS006	Well biofilm	-	-	P1	Delivery 1	Before transport	10.2	0.406	0	0	0	0	0
Case A	RS008	Well biofilm	-	-	P1	Delivery 1	Before transport	6.1	0.403	0	0	0	0	0
Case A	RS009	Well biofilm	-	-	P1	Delivery 1	Before transport	13.1	0.419	0	0	0	0	0
Case A	RS011	Pipe biofilm	-	-	P1	Delivery 1	Before transport	8.3	0.41	0	0	0	0	0
Case A	RS012	Pipe biofilm	-	-	P1	Delivery 1	Before transport	9.4	0.418	0	0	0	0	0
Case A	RS013	Pipe biofilm	-	-	P1	Delivery 1	Before transport	6.6	0.426	0	0	0	0	0
Case A	RS014	Pipe biofilm	-	-	P1	Delivery 1	Before transport	10.9	0.422	0	0	0	0	0
Case A	RS015	Pipe biofilm	-	-	P1	Delivery 1	Before transport	6.9	0.374	0	0	0	0	0
Case A	RS016	Pipe biofilm	-	-	P1	Delivery 1	Before transport	7.8	0.428	0	0	0	0	0
Case A	RS025	Degasser biofilm	-	-	P1	Delivery 1	Before transport	9.1	0.438	0	0	0	0	0
Case A	RS026	Degasser biofilm	-	-	P1	Delivery 1	Before transport	11.2	0.457	0	0	0	0	0
Case A	RS027	Degasser biofilm	-	-	P1	Delivery 1	Before transport	8.5	0.447	0	0	0	0	0
Case A	RS028	Degasser biofilm	-	-	P1	Delivery 1	Before transport	6.9	0.398	0	0	0	0	0
Case A	RS029	Hull biofouling	Mid	0m	P1	Delivery 1	Before transport	7.7	0.408	0	0	0	0	0
Case A	RS030	Hull biofouling	Mid	0m	P1	Delivery 1	Before transport	6.4	0.374	0	0	0	0	0
Case A	RS031	Hull biofouling	Mid	0m	P1	Delivery 1	Before transport	10.1	0.458	0	0	0	0	0
Case A	RS032	Well water	-	-	P3	Delivery 1	Ongoing transport	3.7	0.329	39.0358	1.26847e-05	18.3	0	18.3
Case A	RS033	Well water	-	-	P3	Delivery 1	Ongoing transport	5.2	0.273	0	0	0	0	0
Case A	RS034	Well water	-	-	P3	Delivery 1	Ongoing transport	8.3	0.24	0	0	0	0	0
Case A	RS035	Well water	-	-	P3	Delivery 1	Ongoing transport	3	0.257	0	0	0	0	0
Case A	RS044	Degasser biofilm	-	-	P3	Delivery 1	Ongoing transport	15.1	0.556	0	0	0	0	0
Case A	RS045	Degasser biofilm	-	-	P3	Delivery 1	Ongoing transport	14.7	0.391	40.0777	4.39532e-06	3.24	0	3.24
Case A	RS046	Degasser biofilm	-	-	P3	Delivery 1	Ongoing transport	8.1	0.369	39.5399	7.59587e-06	6.34	0	6.34
Case A	RS047	Degasser biofilm	-	-	P3	Delivery 1	Ongoing transport	7.9	0.378	39.3419	9.29057e-06	9.27	0	9.27
Case A	RS048	Fish skin	-	-	P2	Delivery 1	At loading	22.8	1.49	38.8165	1.58562e-05	21.3	2.48	18.82
Case A	RS049	Fish gill	-	-	P2	Delivery 1	At loading	48.7	2.56	40.0093	4.71201e-06	7.25	0.66	6.59
Case A	RS050	Fish gut	-	-	P2	Delivery 1	At loading	45	2.34	0	0	0	0	0
Case A	RS051	Fish skin	-	-	P2	Delivery 1	At loading	57.2	2.84	29.5142	0.204212	2340	0.44	2339.56
Case A	RS052	Fish gill	-	-	P2	Delivery 1	At loading	54.8	2.48	30.4128	0.0818536	2078	0.4	2077.6
Case A	RS053	Fish gut	-	-	P2	Delivery 1	At loading	56.5	2.61	31.1422	0.0389752	1311	1.63	1309.37
Case A	RS054	Fish skin	-	-	P2	Delivery 1	At loading	84.3	3.79	26.3631	5.03816	31977	1.25	31975.8
Case A	RS055	Fish gill	-	-	P2	Delivery 1	At loading	44.8	2.45	30.3835	0.0843321	2388	0.37	2387.63
Case A	RS056	Fish gut	-	-	P2	Delivery 1	At loading	10.5	0.652	35.6635	0.00039193	89	0.47	88.53
Case A	RS057	Fish skin	-	-	P2	Delivery 1	At loading	58.7	2.78	0	0	0	0	0
Case A	RS058	Fish gill	-	-	P2	Delivery 1	At loading	23.3	1.02	0	0	0	0	0
Case A	RS059	Fish gut	-	-	P2	Delivery 1	At loading	56.5	2.15	36.0582	0.00026232	33.2	0.41	32.79
Case A	RS060	Fish skin	-	-	P2	Delivery 1	At loading	166.2	8.51	30.7812	0.0562739	3271	0	3271
Case A	RS061	Fish gill	-	-	P2	Delivery 1	At loading	212.2	8.57	30.4726	0.077027	2388	0	2388
Case A	RS062	Fish gut	-	-	P2	Delivery 1	At loading	787.1	34.5	27.9766	0.97585	13822	0	13822
Case A	RS063	Fish skin	-	-	P2	Delivery 1	At loading	233	8.09	27.0181	2.5874	33589	0	33589
Case A	RS064	Fish gill	-	-	P2	Delivery 1	At loading	228.9	8.74	26.8552	3.05389	25009	0	25009
Case A	RS065	Fish gut	-	-	P2	Delivery 1	At loading	338.4	15	28.2297	0.754324	9930	0	9930
Case A	RS066	Well water	-	-	P4	Delivery 1	After transport	1.3	0.279	41.0375	1.65544e-06	171.5	0	171.5
Case A	RS067	Well water	-	-	P4	Delivery 1	After transport	0.2	0.284	0	0	0	0	0
Case A	RS068	Well water	-	-	P4	Delivery 1	After transport	2.7	0.225	41.0791	1.58688e-06	18.3	0	18.3
Case A	RS069	Well water	-	-	P4	Delivery 1	After transport	4.9	0.345	39.6363	6.88657e-06	10.9	0	10.9
Case A	RS090	Degasser biofilm	-	-	P4	Delivery 1	After transport	8.3	0.359	36.6894	0.000138027	29	0	29
Case A	RS091	Degasser biofilm	-	-	P4	Delivery 1	After transport	15.9	0.332	37.1987	8.22122e-05	17.1	0	17.1
Case A	RS092	Degasser biofilm	-	-	P4	Delivery 1	After transport	9.6	0.771	33.7608	0.0027157	191	0	191
Case A	RS093	Degasser biofilm	-	-	P4	Delivery 1	After transport	7.9	0.448	33.9529	0.0022335	149.1	0	149.1
Case A	RS094	Hull biofouling	Mid	0m	P4	Delivery 1	After transport	6.5	0.538	34.7834	0.000959567	120.1	0	120.1
Case A	RS095	Hull biofouling	Mid	0m	P4	Delivery 1	After transport	11.4	0.658	31.2222	0.0359283	965.6	0	965.6
Case A	RS096	Hull biofouling	Mid	0m	P4	Delivery 1	After transport	9.3	0.547	31.1354	0.0392465	1016	0	1016
Case A	RS100	Sea water	-	-	P2	Delivery 1	At loading	4.6	0.291	38.6561	1.86659e-05	3.95	0	3.95
Case A	RS101	Sea water	-	-	P2	Delivery 1	At loading	5.2	0.302	40.1919	3.91291e-06	8.83	0	8.83
Case A	RS102	Sea water	-	-	P2	Delivery 1	At loading	5.9	0.324	39.4628	8.21537e-06	7.53	0	7.53
Case A	RS103	Hull biofouling	Mid	0m	P2	Delivery 1	At loading	8.9	0.375	0	0	0	0	0
Case A	RS104	Hull biofouling	Mid	0m	P2	Delivery 1	At loading	11.1	0.316	37.9826	3.70364e-05	4.19	0	4.19
Case A	RS105	Hull biofouling	Mid	0m	P2	Delivery 1	At loading	16.5	0.538	33.5566	0.00334247	186.7	0	186.7
Case A	RS109	Well biofilm	-	-	P4.2	Delivery 1	Between wash	12.5	0.37	39.8997	5.26782e-06	1.38	0	1.38
Case A	RS110	Well biofilm	-	-	P4.2	Delivery 1	Between wash	14.2	0.397	40.5045	2.84718e-06	5.3	0	5.3
Case A	RS112	Well biofilm	-	-	P4.2	Delivery 1	Between wash	11.8	0.394	0	0	0	0	0
Case A	RS113	Well biofilm	-	-	P4.2	Delivery 1	Between wash	9.4	0.315	41.6735	8.66807e-07	0	0	0
Case A	RS115	Pipe biofilm	-	-	P4.2	Delivery 1	Between wash	7	0.275	0	0	0	0	0
Case A	RS116	Pipe biofilm	-	-	P4.2	Delivery 1	Between wash	6.2	0.475	0	0	0	0	0
Case A	RS118	Pipe biofilm	-	-	P4.2	Delivery 1	Between wash	15.7	0.545	0	0	0	0	0
Case A	RS119	Pipe biofilm	-	-	P4.2	Delivery 1	Between wash	11.5	0.583	0	0	0	0	0
Case A	RS121	Degasser biofilm	-	-	P4.2	Delivery 1	Between wash	10.1	0.492	0	0	0	0	0
Case A	RS122	Degasser biofilm	-	-	P4.2	Delivery 1	Between wash	14.1	0.486	41.4329	1.10718e-06	0.48	0	0.48
Case A	RS123	Degasser biofilm	-	-	P4.2	Delivery 1	Between wash	44.2	0.465	41.3615	1.19066e-06	4.92	0	4.92
Case A	RS124	Degasser biofilm	-	-	P4.2	Delivery 1	Between wash	7.4	0.463	0	0	0	0	0
Case A	RS125	Sea water	-	-	P2	Delivery 2	At loading	5.4	0.283	0	0	0	0	0
Case A	RS126	Sea water	-	-	P2	Delivery 2	At loading	4.5	0.286	0	0	0	0	0
Case A	RS127	Sea water	-	-	P2	Delivery 2	At loading	6.4	0.266	0	0	0	0	0
Case A	RS128	Hull biofouling	Mid	0m	P2	Delivery 2	At loading	9.4	0.441	0	0	0	0	0
Case A	RS129	Hull biofouling	Mid	0m	P2	Delivery 2	At loading	13.9	0.3	0	0	0	0	0
Case A	RS130	Hull biofouling	Mid	0m	P2	Delivery 2	At loading	6.3	0.428	0	0	0	0	0
Case A	RS131	Fish skin	-	-	P2	Delivery 2	At loading	81.1	3.69	38.458	2.28343e-05	10.7	0	10.7
Case A	RS132	Fish gill	-	-	P2	Delivery 2	At loading	217.2	6.03	39.4376	8.429e-06	2.64	0	2.64
Case A	RS133	Fish gut	-	-	P2	Delivery 2	At loading	109.4	5.17	0	0	0	0	0
Case A	RS134	Fish skin	-	-	P2	Delivery 2	At loading	95.8	3.36	41.4048	1.13929e-06	3.28	0	3.28
Case A	RS135	Fish gill	-	-	P2	Delivery 2	At loading	113.9	1.65	40.9943	1.7298e-06	1.29	0	1.29
Case A	RS136	Fish gut	-	-	P2	Delivery 2	At loading	41.2	2.03	39.671	6.64749e-06	8.57	0	8.57
Case A	RS137	Fish skin	-	-	P2	Delivery 2	At loading	103	4.05	41.1524	1.47278e-06	4.09	2.14	1.95
Case A	RS138	Fish gill	-	-	P2	Delivery 2	At loading	127	6	0	0	0	0	0
Case A	RS139	Fish gut	-	-	P2	Delivery 2	At loading	27.5	1.23	0	0	0	0	0
Case A	RS140	Fish skin	-	-	P2	Delivery 2	At loading	74.8	2.42	38.501	2.18575e-05	8.58	0	8.58
Case A	RS141	Fish gill	-	-	P2	Delivery 2	At loading	163.1	4.64	39.3531	9.18581e-06	3.39	0	3.39
Case A	RS142	Fish gut	-	-	P2	Delivery 2	At loading	85	2.73	0	0	0	0	0
Case A	RS143	Fish skin	-	-	P2	Delivery 2	At loading	67.6	3.25	39.8631	5.46758e-06	2.85	0	2.85
Case A	RS144	Fish gill	-	-	P2	Delivery 2	At loading	153.2	3.28	41.1529	1.4721e-06	0.74	0	0.74
Case A	RS145	Fish gut	-	-	P2	Delivery 2	At loading	34.4	1.84	40.8035	2.10042e-06	2.74	0	2.74
Case A	RS146	Fish skin	-	-	P2	Delivery 2	At loading	39.4	2.02	41.227	1.36524e-06	2.94	0	2.94
Case A	RS147	Fish gill	-	-	P2	Delivery 2	At loading	103.9	3.02	39.2981	9.71394e-06	8.96	0	8.96
Case A	RS149	Well water	-	-	P3	Delivery 2	Ongoing transport	5.2	0.259	0	0	0	0	0
Case A	RS150	Well water	-	-	P3	Delivery 2	Ongoing transport	5.5	0.249	0	0	0	0	0
Case A	RS151	Well water	-	-	P3	Delivery 2	Ongoing transport	4.2	0.24	0	0	0	0	0
Case A	RS152	Well water	-	-	P3	Delivery 2	Ongoing transport	5.8	0.205	0	0	0	0	0
Case A	RS153	Well water	-	-	P4	Delivery 2	After transport	3.4	0.28	0	0	0	0	0
Case A	RS154	Well water	-	-	P4	Delivery 2	After transport	2	0.251	0	0	0	0	0
Case A	RS155	Well water	-	-	P4	Delivery 2	After transport	6.7	0.289	0	0	0	0	0
Case A	RS156	Well water	-	-	P4	Delivery 2	After transport	5.5	0.204	0	0	0	0	0
Case A	RS163	Degasser biofilm	-	-	P4	Delivery 2	After transport	6.7	0.382	0	0	0	0	0
Case A	RS164	Degasser biofilm	-	-	P4	Delivery 2	After transport	4.4	0.35	40.5682	2.66836e-06	6.6	0	6.6
Case A	RS165	Degasser biofilm	-	-	P4	Delivery 2	After transport	4.6	0.304	39.9215	5.15221e-06	7.51	0	7.51
Case A	RS166	Degasser biofilm	-	-	P4	Delivery 2	After transport	8.5	0.472	37.7937	4.48825e-05	13.2	0	13.2
Case A	RS167	Hull biofouling	Mid	0m	P4	Delivery 2	After transport	10.7	0.456	41.7197	8.26981e-07	1.41	0	1.41
Case A	RS168	Hull biofouling	Mid	0m	P4	Delivery 2	After transport	13.5	0.469	41.5325	1.00047e-06	2.37	0	2.37
Case A	RS169	Hull biofouling	Mid	0m	P4	Delivery 2	After transport	14	1.05	39.0056	1.30811e-05	15.6	1.04	14.56
Case A	RS170	Well biofilm	-	-	P4	Delivery 2	After transport	7	0.507	41.4926	1.04195e-06	1.79	0	1.79
Case A	RS171	Well biofilm	-	-	P4	Delivery 2	After transport	88.4	1.71	38.5278	2.12678e-05	47.3	0.52	46.78
Case A	RS172	Well biofilm	-	-	P4	Delivery 2	After transport	47.4	1.22	0	0	0	0	0
Case A	RS173	Well biofilm	-	-	P4	Delivery 2	After transport	8.5	0.528	0	0	0	0	0
Case A	RS174	Well biofilm	-	-	P4	Delivery 2	After transport	112.2	1.95	39.3192	9.50795e-06	10	0	10
Case A	RS175	Well biofilm	-	-	P4	Delivery 2	After transport	57	1.59	41.3657	1.1855e-06	4.44	0.4	4.04
Case A	RS176	Pipe biofilm	-	-	P4	Delivery 2	After transport	89.3	1.5	39.2727	9.96862e-06	8.96	0.47	8.49
Case A	RS177	Pipe biofilm	-	-	P4	Delivery 2	After transport	20.3	0.494	41.483	1.05215e-06	2.79	0.93	1.86
Case A	RS178	Pipe biofilm	-	-	P4	Delivery 2	After transport	117.6	2.59	40.2265	3.77759e-06	12.3	0.85	11.45
Case A	RS179	Pipe biofilm	-	-	P4	Delivery 2	After transport	67.5	1.65	41.4884	1.04638e-06	5.14	0.86	4.28
Case A	RS180	Pipe biofilm	-	-	P4	Delivery 2	After transport	21.7	0.521	0	0	0	0	0
Case A	RS181	Pipe biofilm	-	-	P4	Delivery 2	After transport	15	0.519	39.8964	5.28508e-06	1.76	0.88	0.88
Case A	RS182	Well biofilm	-	-	P5	Delivery 2	After wash	10.4	0.197	0	0	0	0	0
Case A	RS183	Well biofilm	-	-	P5	Delivery 2	After wash	11.8	0.341	0	0	0	0	0
Case A	RS184	Well biofilm	-	-	P5	Delivery 2	After wash	10.1	0.264	0	0	0	0	0
Case A	RS185	Well biofilm	-	-	P5	Delivery 2	After wash	5	0.323	0	0	0	0	0
Case A	RS186	Pipe biofilm	-	-	P5	Delivery 2	After wash	10.4	0.309	0	0	0	0	0
Case A	RS187	Pipe biofilm	-	-	P5	Delivery 2	After wash	19.7	0.324	0	0	0	0	0
Case A	RS188	Pipe biofilm	-	-	P5	Delivery 2	After wash	10.3	0.371	0	0	0	0	0
Case A	RS189	Pipe biofilm	-	-	P5	Delivery 2	After wash	11	0.446	0	0	0	0	0
Case A	RS190	Degasser biofilm	-	-	P5	Delivery 2	After wash	27.5	0.373	0	0	0	0	0
Case A	RS191	Degasser biofilm	-	-	P5	Delivery 2	After wash	6.3	0.355	0	0	0	0	0
Case A	RS192	Well biofilm	-	-	P6	Delivery 2	After fallowing	13.8	0.425	0	0	0	0	0
Case A	RS193	Well biofilm	-	-	P6	Delivery 2	After fallowing	6.3	0.343	0	0	0	0	0
Case A	RS194	Well biofilm	-	-	P6	Delivery 2	After fallowing	4.4	0.349	0	0	0	0	0
Case A	RS195	Well biofilm	-	-	P6	Delivery 2	After fallowing	9.3	0.351	0	0	0	0	0
Case A	RS196	Pipe biofilm	-	-	P6	Delivery 2	After fallowing	16.7	0.323	0	0	0	0	0
Case A	RS197	Pipe biofilm	-	-	P6	Delivery 2	After fallowing	14.6	0.407	0	0	0	0	0
Case A	RS198	Pipe biofilm	-	-	P6	Delivery 2	After fallowing	11.3	0.391	0	0	0	0	0
Case A	RS199	Pipe biofilm	-	-	P6	Delivery 2	After fallowing	11.4	0.365	0	0	0	0	0
Case A	RS200	Degasser biofilm	-	-	P6	Delivery 2	After fallowing	13.2	0.423	0	0	0	0	0
Case A	RS201	Degasser biofilm	-	-	P6	Delivery 2	After fallowing	6	0.352	0	0	0	0	0
Case A	RS202	Hull biofouling	Mid	0m	P6	Delivery 2	After fallowing	4	0.312	0	0	0	0	0
Case A	RS203	Hull biofouling	Mid	0m	P6	Delivery 2	After fallowing	7.8	0.414	0	0	0	0	0
Case B	NRL001	Hull biofouling	Bow	0m	P4	Delivery 1	At slaughterhouse	9.2	0.393	0	0	0	0	0
Case B	NRL002	Hull biofouling	Bow	0m	P4	Delivery 1	At slaughterhouse	5.2	0.331	0	0	0	0	0
Case B	NRL003	Hull biofouling	Bow	3m	P4	Delivery 1	At slaughterhouse	11	0.462	0	0	0	0	0
Case B	NRL004	Hull biofouling	Bow	3m	P4	Delivery 1	At slaughterhouse	3.4	0.324	0	0	0	0	0
Case B	NRL005	Hull biofouling	Mid	0m	P4	Delivery 1	At slaughterhouse	12.7	0.44	42.4677	3.86414e-07	7.55	0	7.55
Case B	NRL006	Hull biofouling	Mid	0m	P4	Delivery 1	At slaughterhouse	23.5	0.507	0	0	0	0	0
Case B	NRL007	Hull biofouling	Mid	3m	P4	Delivery 1	At slaughterhouse	16.5	0.451	0	0	0	0	0
Case B	NRL008	Hull biofouling	Mid	3m	P4	Delivery 1	At slaughterhouse	31.2	0.696	39.1325	1.14967e-05	3.25	0	3.25
Case B	NRL009	Hull biofouling	Stern	0m	P4	Delivery 1	At slaughterhouse	2.7	0.332	0	0	0	0	0
Case B	NRL010	Hull biofouling	Stern	0m	P4	Delivery 1	At slaughterhouse	7.4	0.334	0	0	0	0	0
Case B	NRL011	Hull biofouling	Stern	3m	P4	Delivery 1	At slaughterhouse	5.8	0.406	0	0	0	0	0
Case B	NRL012	Hull biofouling	Stern	3m	P4	Delivery 1	At slaughterhouse	3.8	0.327	0	0	0	0	0
Case B	NRL013	Sea water	-	-	P4	Delivery 1	At slaughterhouse	3.3	0.295	0	0	0	0	0
Case B	NRL014	Sea water	-	-	P4	Delivery 1	At slaughterhouse	3.4	0.393	0	0	0	0	0
Case B	NRL017	Fish skin	-	-	P4	Delivery 1	At slaughterhouse	141.6	2.68	38.0072	3.61215e-05	36.5	0	36.5
Case B	NRL018	Fish gill	-	-	P4	Delivery 1	At slaughterhouse	166.3	3.8	0	0	0	0	0
Case B	NRL019	Fish skin	-	-	P4	Delivery 1	At slaughterhouse	91.4	1.8	38.0536	3.4456e-05	45.3	0.39	44.91
Case B	NRL020	Fish gill	-	-	P4	Delivery 1	At slaughterhouse	177.6	3.17	0	0	0	0	0
Case B	NRL021	Fish skin	-	-	P4	Delivery 1	At slaughterhouse	123	2.91	36.4087	0.000183638	101.5	0	101.5
Case B	NRL022	Fish gill	-	-	P4	Delivery 1	At slaughterhouse	155.7	3.26	0	0	0	0	0
Case B	NRL023	Hull biofouling	Bow	0m	P2	Delivery 2	While fish loading	5.9	0.406	0	0	0	0	0
Case B	NRL024	Hull biofouling	Bow	0m	P2	Delivery 2	While fish loading	5.7	0.447	40.9717	1.77008e-06	7.95	0	7.95
Case B	NRL025	Hull biofouling	Bow	3m	P2	Delivery 2	While fish loading	7.8	0.432	41.9975	6.23389e-07	4.61	0	4.61
Case B	NRL026	Hull biofouling	Bow	3m	P2	Delivery 2	While fish loading	14.1	0.496	38.2883	2.71374e-05	28.4	0	28.4
Case B	NRL027	Hull biofouling	Mid	0m	P2	Delivery 2	While fish loading	8.6	0.397	0	0	0	0	0
Case B	NRL028	Hull biofouling	Mid	0m	P2	Delivery 2	While fish loading	3	0.382	0	0	0	0	0
Case B	NRL029	Hull biofouling	Mid	3m	P2	Delivery 2	While fish loading	11	0.403	0	0	0	0	0
Case B	NRL030	Hull biofouling	Mid	3m	P2	Delivery 2	While fish loading	2.9	0.29	0	0	0	0	0
Case B	NRL031	Hull biofouling	Stern	0m	P2	Delivery 2	While fish loading	3.7	0.341	0	0	0	0	0
Case B	NRL032	Hull biofouling	Stern	0m	P2	Delivery 2	While fish loading	6.5	0.353	41.233	1.35683e-06	9.62	0	9.62
Case B	NRL033	Hull biofouling	Stern	3m	P2	Delivery 2	While fish loading	2.7	0.284	0	0	0	0	0
Case B	NRL034	Hull biofouling	Stern	3m	P2	Delivery 2	While fish loading	9	0.388	0	0	0	0	0
Case B	NRL035	Sea water	-	-	P2	Delivery 2	While fish loading	5.8	0.372	0	0	0	0	0
Case B	NRL036	Sea water	-	-	P2	Delivery 2	While fish loading	19.7	0.351	0	0	0	0	0
Case B	NRL037	Pen biofouling	-	-	P2	Delivery 2	While fish loading	128.2	2.32	42.2558	4.79366e-07	0.33	0	0.33
Case B	NRL038	Pen biofouling	-	-	P2	Delivery 2	While fish loading	15.3	0.498	38.4986	2.19097e-05	48.7	0	48.7
Case B	NRL039	Fish skin	-	-	P2	Delivery 2	While fish loading	80.8	1.59	29.4958	0.208062	18224	0	18224
Case B	NRL040	Fish gill	-	-	P2	Delivery 2	While fish loading	123.9	1.95	27.0161	2.59276	46362	0	46362
Case B	NRL041	Fish skin	-	-	P2	Delivery 2	While fish loading	194.7	3.5	31.5332	0.0261853	7248	0	7248
Case B	NRL042	Fish gill	-	-	P2	Delivery 2	While fish loading	232.2	6.15	36.2462	0.000216652	256.7	0	256.7
Case B	NRL043	Fish skin	-	-	P2	Delivery 2	While fish loading	106.4	2.22	28.115	0.847685	24688	1.2	24686.8
Case B	NRL044	Fish gill	-	-	P2	Delivery 2	While fish loading	202	4.74	27.8003	1.16753	44661	0	44661
Case B	NRL045	Hull biofouling	Bow	0m	P4	Delivery 2	At slaughterhouse	12.7	0.52	0	0	0	0	0
Case B	NRL046	Hull biofouling	Bow	0m	P4	Delivery 2	At slaughterhouse	14.4	0.566	42.1854	5.14961e-07	18.9	0	18.9
Case B	NRL047	Hull biofouling	Bow	3m	P4	Delivery 2	At slaughterhouse	8.9	0.47	0	0	0	0	0
Case B	NRL048	Hull biofouling	Bow	3m	P4	Delivery 2	At slaughterhouse	12.2	0.483	0	0	0	0	0
Case B	NRL049	Hull biofouling	Mid	0m	P4	Delivery 2	At slaughterhouse	5.8	0.364	0	0	0	0	0
Case B	NRL050	Hull biofouling	Mid	0m	P4	Delivery 2	At slaughterhouse	6.8	0.351	0	0	0	0	0
Case B	NRL051	Hull biofouling	Mid	3m	P4	Delivery 2	At slaughterhouse	4.2	0.378	0	0	0	0	0
Case B	NRL052	Hull biofouling	Mid	3m	P4	Delivery 2	At slaughterhouse	3.7	0.363	0	0	0	0	0
Case B	NRL053	Hull biofouling	Stern	0m	P4	Delivery 2	At slaughterhouse	39.8	0.702	0	0	0	0	0
Case B	NRL054	Hull biofouling	Stern	0m	P4	Delivery 2	At slaughterhouse	29.5	0.654	0	0	0	0	0
Case B	NRL055	Hull biofouling	Stern	3m	P4	Delivery 2	At slaughterhouse	5.2	0.325	0	0	0	0	0
Case B	NRL056	Hull biofouling	Stern	3m	P4	Delivery 2	At slaughterhouse	15.5	0.451	0	0	0	0	0
Case B	NRL057	Sea water	-	-	P4	Delivery 2	At slaughterhouse	4.8	0.283	0	0	0	0	0
Case B	NRL058	Sea water	-	-	P4	Delivery 2	At slaughterhouse	6.9	0.299	0	0	0	0	0
Case B	NRL059	Hull biofouling	Bow	0m	P6	Delivery 2	After fallowing	47.4	0.987	0	0	0	0	0
Case B	NRL060	Hull biofouling	Bow	0m	P6	Delivery 2	After fallowing	34.2	0.777	0	0	0	0	0
Case B	NRL061	Hull biofouling	Bow	3m	P6	Delivery 2	After fallowing	34.4	0.854	0	0	0	0	0
Case B	NRL062	Hull biofouling	Bow	3m	P6	Delivery 2	After fallowing	69	1.6	0	0	0	0	0
Case B	NRL063	Hull biofouling	Mid	0m	P6	Delivery 2	After fallowing	9.8	0.4	0	0	0	0	0
Case B	NRL064	Hull biofouling	Mid	0m	P6	Delivery 2	After fallowing	20.6	0.538	0	0	0	0	0
Case B	NRL065	Hull biofouling	Mid	3m	P6	Delivery 2	After fallowing	53.5	1.12	0	0	0	0	0
Case B	NRL066	Hull biofouling	Mid	3m	P6	Delivery 2	After fallowing	53	1.15	0	0	0	0	0
Case B	NRL067	Hull biofouling	Stern	0m	P6	Delivery 2	After fallowing	5.6	0.328	0	0	0	0	0
Case B	NRL068	Hull biofouling	Stern	0m	P6	Delivery 2	After fallowing	14	0.398	0	0	0	0	0
Case B	NRL069	Hull biofouling	Stern	3m	P6	Delivery 2	After fallowing	47.8	1.08	0	0	0	0	0
Case B	NRL070	Hull biofouling	Stern	3m	P6	Delivery 2	After fallowing	81.3	1.55	0	0	0	0	0
Case B	NRL071	Sea water	-	-	P6	Delivery 2	After fallowing	4.6	0.301	0	0	0	0	0
Case B	NRL072	Sea water	-	-	P6	Delivery 2	After fallowing	3.2	0.276	0	0	0	0	0
Case C	MSV001	Hull biofouling	Bow	0m	P1	Delivery 1	At slaughterhouse	27	0.229	0	0	0	0	0
Case C	MSV002	Hull biofouling	Bow	0m	P1	Delivery 1	At slaughterhouse	5.5	0.276	0	0	0	0	0
Case C	MSV003	Hull biofouling	Bow	3m	P1	Delivery 1	At slaughterhouse	3.6	0.215	0	0	0	0	0
Case C	MSV004	Hull biofouling	Bow	3m	P1	Delivery 1	At slaughterhouse	2.5	0.23	0	0	0	0	0
Case C	MSV005	Hull biofouling	Mid	0m	P1	Delivery 1	At slaughterhouse	6.7	0.238	0	0	0	0	0
Case C	MSV006	Hull biofouling	Mid	0m	P1	Delivery 1	At slaughterhouse	8.1	0.297	0	0	0	0	0
Case C	MSV007	Hull biofouling	Mid	3m	P1	Delivery 1	At slaughterhouse	17.8	0.244	0	0	0	0	0
Case C	MSV008	Hull biofouling	Mid	3m	P1	Delivery 1	At slaughterhouse	8.8	0.242	0	0	0	0	0
Case C	MSV009	Hull biofouling	Stern	0m	P1	Delivery 1	At slaughterhouse	3.2	0.232	0	0	0	0	0
Case C	MSV010	Hull biofouling	Stern	0m	P1	Delivery 1	At slaughterhouse	6.8	0.295	0	0	0	0	0
Case C	MSV011	Hull biofouling	Stern	3m	P1	Delivery 1	At slaughterhouse	7.7	0.31	0	0	0	0	0
Case C	MSV012	Hull biofouling	Stern	3m	P1	Delivery 1	At slaughterhouse	17.6	0.411	0	0	0	0	0
Case C	MSV013	Sea water	-	-	P1	Delivery 1	At slaughterhouse	5.7	0.408	0	0	0	0	0
Case C	MSV014	Sea water	-	-	P1	Delivery 1	At slaughterhouse	3	0.361	0	0	0	0	0
Case C	MSV015	Hull biofouling	Bow	0m	P2	Delivery 1	While fish loading	2	0.232	0	0	0	0	0
Case C	MSV016	Hull biofouling	Bow	0m	P2	Delivery 1	While fish loading	3.4	0.245	0	0	0	0	0
Case C	MSV017	Hull biofouling	Bow	3m	P2	Delivery 1	While fish loading	4.2	0.219	0	0	0	0	0
Case C	MSV018	Hull biofouling	Bow	3m	P2	Delivery 1	While fish loading	3.3	0.218	0	0	0	0	0
Case C	MSV019	Hull biofouling	Mid	0m	P2	Delivery 1	While fish loading	2.5	0.228	0	0	0	0	0
Case C	MSV020	Hull biofouling	Mid	0m	P2	Delivery 1	While fish loading	2.8	0.238	0	0	0	0	0
Case C	MSV021	Hull biofouling	Mid	3m	P2	Delivery 1	While fish loading	3.6	0.289	0	0	0	0	0
Case C	MSV022	Hull biofouling	Mid	3m	P2	Delivery 1	While fish loading	5.1	0.239	0	0	0	0	0
Case C	MSV023	Hull biofouling	Stern	0m	P2	Delivery 1	While fish loading	3.9	0.248	0	0	0	0	0
Case C	MSV024	Hull biofouling	Stern	0m	P2	Delivery 1	While fish loading	22	0.322	0	0	0	0	0
Case C	MSV025	Hull biofouling	Stern	3m	P2	Delivery 1	While fish loading	6.7	0.303	0	0	0	0	0
Case C	MSV026	Hull biofouling	Stern	3m	P2	Delivery 1	While fish loading	54.6	0.976	0	0	0	0	0
Case C	MSV027	Sea water	-	-	P2	Delivery 1	While fish loading	3.7	0.377	0	0	0	0	0
Case C	MSV028	Sea water	-	-	P2	Delivery 1	While fish loading	3	0.353	0	0	0	0	0
Case C	MSV029	Pen biofouling	-	-	P2	Delivery 1	While fish loading	32	0.858	0	0	0	0	0
Case C	MSV030	Pen biofouling	-	-	P2	Delivery 1	While fish loading	23.1	0.679	0	0	0	0	0
Case C	MSV031	Fish skin	-	-	P2	Delivery 1	While fish loading	176.4	3.8	40.1849	3.94106e-06	178.9	65.3	113.6
Case C	MSV032	Fish gill	-	-	P2	Delivery 1	While fish loading	157.3	3.12	41.4892	1.04557e-06	56.5	55.8	0.7
Case C	MSV033	Fish skin	-	-	P2	Delivery 1	While fish loading	174.4	3.38	40.9346	1.83816e-06	146.4	69.6	76.8
Case C	MSV034	Fish gill	-	-	P2	Delivery 1	While fish loading	199	4.64	41.5812	9.52164e-07	12.5	24.3	-11.8
Case C	MSV035	Fish skin	-	-	P2	Delivery 1	While fish loading	246.1	5.79	40.924	1.85806e-06	84.1	128.4	-44.3
Case C	MSV036	Fish gill	-	-	P2	Delivery 1	While fish loading	166.2	3.57	41.6888	8.53439e-07	25.3	29.5	-4.2
Case C	MSV037	Hull biofouling	Bow	0m	P3	Delivery 1	During transport	3.1	0.233	0	0	0	0	0
Case C	MSV038	Hull biofouling	Bow	0m	P3	Delivery 1	During transport	4.9	0.489	0	0	0	0	0
Case C	MSV039	Hull biofouling	Mid	0m	P3	Delivery 1	During transport	3.7	0.247	0	0	0	0	0
Case C	MSV040	Hull biofouling	Mid	0m	P3	Delivery 1	During transport	9.3	0.239	0	0	0	0	0
Case C	MSV041	Hull biofouling	Stern	0m	P3	Delivery 1	During transport	5	0.243	0	0	0	0	0
Case C	MSV042	Hull biofouling	Stern	0m	P3	Delivery 1	During transport	4.8	0.484	0	0	0	0	0
Case C	MSV043	Sea water	-	-	P3	Delivery 1	During transport	3.2	0.297	0	0	0	0	0
Case C	MSV044	Sea water	-	-	P3	Delivery 1	During transport	4.2	0.342	0	0	0	0	0
Case C	MSV045	Hull biofouling	Bow	0m	P4	Delivery 1	At slaughterhouse	4.9	0.27	0	0	0	0	0
Case C	MSV046	Hull biofouling	Bow	0m	P4	Delivery 1	At slaughterhouse	5.2	0.359	0	0	0	0	0
Case C	MSV047	Hull biofouling	Bow	3m	P4	Delivery 1	At slaughterhouse	12.2	0.353	0	0	0	0	0
Case C	MSV048	Hull biofouling	Bow	3m	P4	Delivery 1	At slaughterhouse	9	0.292	0	0	0	0	0
Case C	MSV049	Hull biofouling	Mid	0m	P4	Delivery 1	At slaughterhouse	2.9	0.285	0	0	0	0	0
Case C	MSV050	Hull biofouling	Mid	0m	P4	Delivery 1	At slaughterhouse	7.2	0.304	41.5508	9.82075e-07	5.47	1.46	4.01
Case C	MSV051	Hull biofouling	Mid	3m	P4	Delivery 1	At slaughterhouse	9.9	0.343	0	0	0	0	0
Case C	MSV052	Hull biofouling	Mid	3m	P4	Delivery 1	At slaughterhouse	5	0.297	41.3984	1.14675e-06	2.79	0	2.79
Case C	MSV053	Hull biofouling	Stern	0m	P4	Delivery 1	At slaughterhouse	9.5	0.286	0	0	0	0	0
Case C	MSV054	Hull biofouling	Stern	0m	P4	Delivery 1	At slaughterhouse	3.9	0.251	0	0	0	0	0
Case C	MSV055	Hull biofouling	Stern	3m	P4	Delivery 1	At slaughterhouse	24.7	0.502	0	0	0	0	0
Case C	MSV056	Hull biofouling	Stern	3m	P4	Delivery 1	At slaughterhouse	12	0.392	0	0	0	0	0
Case C	MSV057	Sea water	Water	-	P4	Delivery 1	At slaughterhouse	16.1	0.281	0	0	0	0	0
Case C	MSV058	Sea water	Water	-	P4	Delivery 1	At slaughterhouse	3.8	0.371	0	0	0	0	0
Case C	MSV059	Hull biofouling	Bow	0m	P2	Delivery 1	While fish loading	2.7	0.386	0	0	0	0	0
Case C	MSV060	Hull biofouling	Bow	3m	P2	Delivery 1	While fish loading	9.4	0.328	0	0	0	0	0
Case C	MSV061	Hull biofouling	Mid	0m	P2	Delivery 1	While fish loading	0.7	0.274	0	0	0	0	0
Case C	MSV062	Hull biofouling	Mid	3m	P2	Delivery 1	While fish loading	0.3	0.285	0	0	0	0	0
Case C	MSV063	Hull biofouling	Stern	0m	P2	Delivery 1	While fish loading	2.5	0.254	0	0	0	0	0
Case C	MSV064	Hull biofouling	Stern	3m	P2	Delivery 1	While fish loading	25	0.643	0	0	0	0	0
Case C	MSV065	Sea water	-	-	P2	Delivery 1	While fish loading	4.5	0.286	0	0	0	0	0
Case C	MSV066	Sea water	-	-	P2	Delivery 1	While fish loading	3.5	0.328	0	0	0	0	0
Case C	MSV067	Pen biofouling	-	-	P2	Delivery 1	While fish loading	51.2	1.04	0	0	0	0	0
Case C	MSV068	Pen biofouling	-	-	P2	Delivery 1	While fish loading	44.6	0.908	0	0	0	0	0
Case C	MSV069	Fish skin	-	-	P2	Delivery 1	While fish loading	216.1	4.96	0	0	0	0	0
Case C	MSV070	Fish gill	-	-	P2	Delivery 1	While fish loading	207.3	4.62	0	0	0	0	0
Case C	MSV071	Fish skin	-	-	P2	Delivery 1	While fish loading	119.8	2.46	0	0	0	0	0
Case C	MSV072	Fish gill	-	-	P2	Delivery 1	While fish loading	150.4	3.1	0	0	0	0	0
Case C	MSV073	Fish skin	-	-	P2	Delivery 1	While fish loading	220.1	5.04	0	0	0	0	0
Case C	MSV074	Fish gill	-	-	P2	Delivery 1	While fish loading	173.8	3.66	0	0	0	0	0
Case C	MSV075	Hull biofouling	Bow	0m	P5	Delivery 1	after disinf	5.4	0.314	0	0	0	0	0
Case C	MSV076	Hull biofouling	Bow	0m	P5	Delivery 1	after disinf	8.3	0.343	0	0	0	0	0
Case C	MSV077	Hull biofouling	Bow	3m	P5	Delivery 1	after disinf	35.7	0.791	0	0	0	0	0
Case C	MSV078	Hull biofouling	Bow	3m	P5	Delivery 1	after disinf	51.3	1.06	0	0	0	0	0
Case C	MSV079	Hull biofouling	Mid	0m	P5	Delivery 1	after disinf	5.4	0.327	0	0	0	0	0
Case C	MSV080	Hull biofouling	Mid	0m	P5	Delivery 1	after disinf	3.4	0.271	0	0	0	0	0
Case C	MSV081	Hull biofouling	Mid	3m	P5	Delivery 1	after disinf	3.2	0.262	0	0	0	0	0
Case C	MSV082	Hull biofouling	Mid	3m	P5	Delivery 1	after disinf	4.2	0.31	0	0	0	0	0
Case C	MSV083	Hull biofouling	Stern	0m	P5	Delivery 1	after disinf	5	0.418	0	0	0	0	0
Case C	MSV084	Hull biofouling	Stern	0m	P5	Delivery 1	after disinf	10.4	0.5	0	0	0	0	0
Case C	MSV085	Hull biofouling	Stern	3m	P5	Delivery 1	after disinf	19.6	0.612	0	0	0	0	0
Case C	MSV086	Hull biofouling	Stern	3m	P5	Delivery 1	after disinf	46.7	1.08	0	0	0	0	0
Case C	MSV087	Sea water	-	-	P5	Delivery 1	after disinf	3.9	0.264	0	0	0	0	0
Case C	MSV088	Sea water	-	-	P5	Delivery 1	after disinf	3.9	0.333	0	0	0	0	0
Case C	MSV089	Hull biofouling	Bow	0m	P6	Delivery 1	After fallowing	12.9	0.584	0	0	0	0	0
Case C	MSV090	Hull biofouling	Bow	0m	P6	Delivery 1	After fallowing	6.6	0.487	0	0	0	0	0
Case C	MSV091	Hull biofouling	Bow	3m	P6	Delivery 1	After fallowing	66.4	1.45	0	0	0	0	0
Case C	MSV092	Hull biofouling	Bow	3m	P6	Delivery 1	After fallowing	17.5	0.505	0	0	0	0	0
Case C	MSV093	Hull biofouling	Mid	0m	P6	Delivery 1	After fallowing	4	0.305	0	0	0	0	0
Case C	MSV094	Hull biofouling	Mid	0m	P6	Delivery 1	After fallowing	2.9	0.429	0	0	0	0	0
Case C	MSV095	Hull biofouling	Mid	3m	P6	Delivery 1	After fallowing	5.3	0.41	0	0	0	0	0
Case C	MSV096	Hull biofouling	Mid	3m	P6	Delivery 1	After fallowing	6.3	0.439	0	0	0	0	0
Case C	MSV097	Hull biofouling	Stern	0m	P6	Delivery 1	After fallowing	16.6	0.58	0	0	0	0	0
Case C	MSV098	Hull biofouling	Stern	0m	P6	Delivery 1	After fallowing	11.4	0.501	0	0	0	0	0
Case C	MSV099	Hull biofouling	Stern	3m	P6	Delivery 1	After fallowing	49.5	1.16	0	0	0	0	0
Case C	MSV100	Hull biofouling	Stern	3m	P6	Delivery 1	After fallowing	43.2	0.929	0	0	0	0	0
Case C	MSV101	Sea water	-	-	P6	Delivery 1	After fallowing	8.1	0.356	0	0	0	0	0
Case C	MSV102	Sea water	-	-	P6	Delivery 1	After fallowing	8.1	0.373	0	0	0	0	0
