# Supplementary material
Source: Research Square preprint supplement (doi:10.21203/rs.3.rs-9503746/v1)
Supplement: Supplementary file 2 [file dc63be3601c46fbbcd8b15cb.xlsx]

## Sheet: Sample Setup
Block Type	96-Well 0.2-mL Block
Calibration Background is expired	No
Calibration Background performed on	06-07-2022
Calibration Pure Dye CY5 is expired	No
Calibration Pure Dye CY5 performed on	08-15-2022
Calibration Pure Dye FAM is expired	No
Calibration Pure Dye FAM performed on	06-07-2022
Calibration Pure Dye NED is expired	No
Calibration Pure Dye NED performed on	08-15-2022
Calibration Pure Dye ROX is expired	No
Calibration Pure Dye ROX performed on	06-07-2022
Calibration Pure Dye SYBR is expired	No
Calibration Pure Dye SYBR performed on	06-07-2022
Calibration Pure Dye TAMRA is expired	No
Calibration Pure Dye TAMRA performed on	08-15-2022
Calibration Pure Dye VIC is expired	No
Calibration Pure Dye VIC performed on	06-07-2022
Calibration ROI is expired	No
Calibration ROI performed on	06-07-2022
Calibration Uniformity is expired	No
Calibration Uniformity performed on	06-07-2022
Chemistry	TAQMAN
Date Created	2023-04-18 00:59:51 AM CEST
Experiment Barcode
Experiment File Name	D:\Applied Biosystems\QuantStudio Design & Analysis Software\User Files\experiments\Marianne\Smittekontroll\2023-04-17_ILAV_Standard curve_TaqMan.eds
Experiment Name	2023-04-17_ILAV_Standard curve_TaqMan
Experiment Run End Time	2023-04-17 15:24:41 PM CEST
Experiment Type	Standard Curve
Instrument Name	QS5-SINTEF
Instrument Serial Number	272523937
Instrument Type	QuantStudio™ 5 System
Passive Reference	ROX
Post-read Stage/Step
Pre-read Stage/Step
Quantification Cycle Method	Ct
Signal Smoothing On	true
Stage/ Cycle where Ct Analysis is performed	Stage2, Step2
Well	Well Position	Sample Name	Sample Color	Biogroup Name	Biogroup Color	Target Name	Target Color	Task	Reporter	Quencher	Quantity	Comments
1	A1	ILAV cDNA 0,1ng/µL	RGB(0,255,255)			ILAV (HRP0)	RGB(176,23,31)	STANDARD	VIC	NFQ-MGB	0.1
2	A2	ILAV cDNA 0,1ng/µL	RGB(0,255,255)			ILAV (HRP0)	RGB(176,23,31)	STANDARD	VIC	NFQ-MGB	0.1
3	A3	ILAV cDNA 0,1ng/µL	RGB(0,255,255)			ILAV (HRP0)	RGB(176,23,31)	STANDARD	VIC	NFQ-MGB	0.1
4	A4
5	A5
6	A6
7	A7
8	A8
9	A9
10	A10
11	A11
12	A12
13	B1	ILAV cDNA 0,02ng/µL	RGB(176,23,31)			ILAV (HRP0)	RGB(176,23,31)	STANDARD	VIC	NFQ-MGB	0.02
14	B2	ILAV cDNA 0,02ng/µL	RGB(176,23,31)			ILAV (HRP0)	RGB(176,23,31)	STANDARD	VIC	NFQ-MGB	0.02
15	B3	ILAV cDNA 0,02ng/µL	RGB(176,23,31)			ILAV (HRP0)	RGB(176,23,31)	STANDARD	VIC	NFQ-MGB	0.02
16	B4
17	B5
18	B6
19	B7
20	B8
21	B9
22	B10
23	B11
24	B12
25	C1	ILAV cDNA 0,004ng/µL	RGB(255,127,0)			ILAV (HRP0)	RGB(176,23,31)	STANDARD	VIC	NFQ-MGB	0.004
26	C2	ILAV cDNA 0,004ng/µL	RGB(255,127,0)			ILAV (HRP0)	RGB(176,23,31)	STANDARD	VIC	NFQ-MGB	0.004
27	C3	ILAV cDNA 0,004ng/µL	RGB(255,127,0)			ILAV (HRP0)	RGB(176,23,31)	STANDARD	VIC	NFQ-MGB	0.004
28	C4
29	C5
30	C6
31	C7
32	C8
33	C9
34	C10
35	C11
36	C12
37	D1	ILAV cDNA 0,0008ng/µL	RGB(139,137,112)			ILAV (HRP0)	RGB(176,23,31)	STANDARD	VIC	NFQ-MGB	0.0008
38	D2	ILAV cDNA 0,0008ng/µL	RGB(139,137,112)			ILAV (HRP0)	RGB(176,23,31)	STANDARD	VIC	NFQ-MGB	0.0008
39	D3	ILAV cDNA 0,0008ng/µL	RGB(139,137,112)			ILAV (HRP0)	RGB(176,23,31)	STANDARD	VIC	NFQ-MGB	0.0008
40	D4
41	D5
42	D6
43	D7
44	D8
45	D9
46	D10
47	D11
48	D12
49	E1	ILAV cDNA 0,00016ng/µL	RGB(238,121,66)			ILAV (HRP0)	RGB(176,23,31)	STANDARD	VIC	NFQ-MGB	0.00016
50	E2	ILAV cDNA 0,00016ng/µL	RGB(238,121,66)			ILAV (HRP0)	RGB(176,23,31)	STANDARD	VIC	NFQ-MGB	0.00016
51	E3	ILAV cDNA 0,00016ng/µL	RGB(238,121,66)			ILAV (HRP0)	RGB(176,23,31)	STANDARD	VIC	NFQ-MGB	0.00016
52	E4
53	E5
54	E6
55	E7
56	E8
57	E9
58	E10
59	E11
60	E12
61	F1	ILAV cDNA 1:20	RGB(255,127,0)			ILAV (HRP0)	RGB(176,23,31)	UNKNOWN	VIC	NFQ-MGB
62	F2	ILAV cDNA 1:10	RGB(0,139,69)			ILAV (HRP0)	RGB(176,23,31)	UNKNOWN	VIC	NFQ-MGB
63	F3	LiMo 0,08ng/µL	RGB(255,128,192)			ILAV (HRP0)	RGB(176,23,31)	UNKNOWN	VIC	NFQ-MGB
64	F4
65	F5
66	F6
67	F7
68	F8
69	F9
70	F10
71	F11
72	F12
73	G1	Mock 0,01ng/µL	RGB(255,255,0)			ILAV (HRP0)	RGB(176,23,31)	UNKNOWN	VIC	NFQ-MGB
74	G2	T.ovolyticum 0,231ng/	RGB(176,23,31)			ILAV (HRP0)	RGB(176,23,31)	UNKNOWN	VIC	NFQ-MGB
75	G3	Fpsychrophilum 0,08ng/µL	RGB(128,255,128)			ILAV (HRP0)	RGB(176,23,31)	UNKNOWN	VIC	NFQ-MGB
76	G4
77	G5
78	G6
79	G7
80	G8
81	G9
82	G10
83	G11
84	G12
85	H1	NTC	RGB(0,0,255)			ILAV (HRP0)	RGB(176,23,31)	UNKNOWN	VIC	NFQ-MGB
86	H2	NTC	RGB(0,0,255)			ILAV (HRP0)	RGB(176,23,31)	UNKNOWN	VIC	NFQ-MGB
87	H3	NTC	RGB(0,0,255)			ILAV (HRP0)	RGB(176,23,31)	UNKNOWN	VIC	NFQ-MGB
88	H4
89	H5
90	H6
91	H7
92	H8
93	H9
94	H10
95	H11
96	H12

## Sheet: Amplification Data
Block Type	96-Well 0.2-mL Block
Calibration Background is expired	No
Calibration Background performed on	06-07-2022
Calibration Pure Dye CY5 is expired	No
Calibration Pure Dye CY5 performed on	08-15-2022
Calibration Pure Dye FAM is expired	No
Calibration Pure Dye FAM performed on	06-07-2022
Calibration Pure Dye NED is expired	No
Calibration Pure Dye NED performed on	08-15-2022
Calibration Pure Dye ROX is expired	No
Calibration Pure Dye ROX performed on	06-07-2022
Calibration Pure Dye SYBR is expired	No
Calibration Pure Dye SYBR performed on	06-07-2022
Calibration Pure Dye TAMRA is expired	No
Calibration Pure Dye TAMRA performed on	08-15-2022
Calibration Pure Dye VIC is expired	No
Calibration Pure Dye VIC performed on	06-07-2022
Calibration ROI is expired	No
Calibration ROI performed on	06-07-2022
Calibration Uniformity is expired	No
Calibration Uniformity performed on	06-07-2022
Chemistry	TAQMAN
Date Created	2023-04-18 00:59:51 AM CEST
Experiment Barcode
Experiment File Name	D:\Applied Biosystems\QuantStudio Design & Analysis Software\User Files\experiments\Marianne\Smittekontroll\2023-04-17_ILAV_Standard curve_TaqMan.eds
Experiment Name	2023-04-17_ILAV_Standard curve_TaqMan
Experiment Run End Time	2023-04-17 15:24:41 PM CEST
Experiment Type	Standard Curve
Instrument Name	QS5-SINTEF
Instrument Serial Number	272523937
Instrument Type	QuantStudio™ 5 System
Passive Reference	ROX
Post-read Stage/Step
Pre-read Stage/Step
Quantification Cycle Method	Ct
Signal Smoothing On	true
Stage/ Cycle where Ct Analysis is performed	Stage2, Step2
Well	Well Position	Cycle	Target Name	Rn	Delta Rn
1	A1	1	ILAV (HRP0)	0.0158757	9.89301e-05
1	A1	2	ILAV (HRP0)	0.0159118	0.000110384
1	A1	3	ILAV (HRP0)	0.0159495	0.000123601
1	A1	4	ILAV (HRP0)	0.0159259	7.53849e-05
1	A1	5	ILAV (HRP0)	0.0161047	0.000229643
1	A1	6	ILAV (HRP0)	0.015967	6.73212e-05
1	A1	7	ILAV (HRP0)	0.0157989	-0.000125352
1	A1	8	ILAV (HRP0)	0.0157734	-0.00017538
1	A1	9	ILAV (HRP0)	0.0159654	-8.01664e-06
1	A1	10	ILAV (HRP0)	0.0159808	-1.71707e-05
1	A1	11	ILAV (HRP0)	0.0160076	-1.49553e-05
1	A1	12	ILAV (HRP0)	0.0161098	6.27197e-05
1	A1	13	ILAV (HRP0)	0.0161432	7.15327e-05
1	A1	14	ILAV (HRP0)	0.0161683	7.20364e-05
1	A1	15	ILAV (HRP0)	0.0159403	-0.000180567
1	A1	16	ILAV (HRP0)	0.0159193	-0.000226144
1	A1	17	ILAV (HRP0)	0.0160787	-9.12612e-05
1	A1	18	ILAV (HRP0)	0.0157915	-0.000403084
1	A1	19	ILAV (HRP0)	0.0158146	-0.000404558
1	A1	20	ILAV (HRP0)	0.01633	8.6309e-05
1	A1	21	ILAV (HRP0)	0.0165081	0.000239864
1	A1	22	ILAV (HRP0)	0.0166783	0.000385429
1	A1	23	ILAV (HRP0)	0.0165501	0.000232648
1	A1	24	ILAV (HRP0)	0.0164462	0.000104173
1	A1	25	ILAV (HRP0)	0.0167115	0.000344954
1	A1	26	ILAV (HRP0)	0.0176468	0.00125565
1	A1	27	ILAV (HRP0)	0.0182946	0.00187885
1	A1	28	ILAV (HRP0)	0.0191547	0.00271445
1	A1	29	ILAV (HRP0)	0.0214414	0.00497654
1	A1	30	ILAV (HRP0)	0.0246371	0.00814766
1	A1	31	ILAV (HRP0)	0.0292409	0.0127269
1	A1	32	ILAV (HRP0)	0.0346963	0.0181578
1	A1	33	ILAV (HRP0)	0.0418718	0.0253086
1	A1	34	ILAV (HRP0)	0.0487902	0.0322025
1	A1	35	ILAV (HRP0)	0.0565286	0.0399163
1	A1	36	ILAV (HRP0)	0.0640116	0.0473747
1	A1	37	ILAV (HRP0)	0.0715013	0.0548399
1	A1	38	ILAV (HRP0)	0.0789553	0.0622693
1	A1	39	ILAV (HRP0)	0.0858677	0.0691571
1	A1	40	ILAV (HRP0)	0.093013	0.0762778
1	A1	41	ILAV (HRP0)	0.0996018	0.0828421
1	A1	42	ILAV (HRP0)	0.105777	0.0889924
1	A1	43	ILAV (HRP0)	0.111432	0.0946231
1	A1	44	ILAV (HRP0)	0.116296	0.0994622
1	A1	45	ILAV (HRP0)	0.118705	0.101847
2	A2	1	ILAV (HRP0)	0.0195288	0.000555798
2	A2	2	ILAV (HRP0)	0.0194901	0.000472398
2	A2	3	ILAV (HRP0)	0.0193277	0.000265296
2	A2	4	ILAV (HRP0)	0.0192627	0.000155605
2	A2	5	ILAV (HRP0)	0.0193037	0.000151902
2	A2	6	ILAV (HRP0)	0.0189651	-0.000231422
2	A2	7	ILAV (HRP0)	0.0188817	-0.000359471
2	A2	8	ILAV (HRP0)	0.0190108	-0.00027509
2	A2	9	ILAV (HRP0)	0.0192889	-4.17004e-05
2	A2	10	ILAV (HRP0)	0.0193525	-2.2791e-05
2	A2	11	ILAV (HRP0)	0.0195522	0.00013227
2	A2	12	ILAV (HRP0)	0.0195286	6.40192e-05
2	A2	13	ILAV (HRP0)	0.0194892	-2.01482e-05
2	A2	14	ILAV (HRP0)	0.019649	9.49631e-05
2	A2	15	ILAV (HRP0)	0.0196319	3.32238e-05
2	A2	16	ILAV (HRP0)	0.0196934	4.99632e-05
2	A2	17	ILAV (HRP0)	0.020055	0.000366948
2	A2	18	ILAV (HRP0)	0.0195637	-0.000169045
2	A2	19	ILAV (HRP0)	0.0194097	-0.000367806
2	A2	20	ILAV (HRP0)	0.0198111	-1.10724e-05
2	A2	21	ILAV (HRP0)	0.0199458	7.89714e-05
2	A2	22	ILAV (HRP0)	0.0200369	0.000125366
2	A2	23	ILAV (HRP0)	0.0199362	-1.99818e-05
2	A2	24	ILAV (HRP0)	0.0199353	-6.56056e-05
2	A2	25	ILAV (HRP0)	0.0200285	-1.70633e-05
2	A2	26	ILAV (HRP0)	0.020631	0.000540674
2	A2	27	ILAV (HRP0)	0.0209489	0.000813918
2	A2	28	ILAV (HRP0)	0.0223761	0.00219643
2	A2	29	ILAV (HRP0)	0.0248305	0.00460608
2	A2	30	ILAV (HRP0)	0.0279558	0.00768669
2	A2	31	ILAV (HRP0)	0.0329502	0.0126365
2	A2	32	ILAV (HRP0)	0.0389165	0.0185581
2	A2	33	ILAV (HRP0)	0.0454034	0.0250002
2	A2	34	ILAV (HRP0)	0.0530466	0.0325987
2	A2	35	ILAV (HRP0)	0.0611918	0.0406993
2	A2	36	ILAV (HRP0)	0.0697067	0.0491695
2	A2	37	ILAV (HRP0)	0.0771654	0.0565835
2	A2	38	ILAV (HRP0)	0.084909	0.0642825
2	A2	39	ILAV (HRP0)	0.0917393	0.071068
2	A2	40	ILAV (HRP0)	0.099182	0.078466
2	A2	41	ILAV (HRP0)	0.106129	0.0853688
2	A2	42	ILAV (HRP0)	0.112884	0.0920787
2	A2	43	ILAV (HRP0)	0.119287	0.0984372
2	A2	44	ILAV (HRP0)	0.124228	0.103333
2	A2	45	ILAV (HRP0)	0.128096	0.107157
3	A3	1	ILAV (HRP0)	0.0202945	0.000136926
3	A3	2	ILAV (HRP0)	0.0201306	-3.93657e-05
3	A3	3	ILAV (HRP0)	0.0200461	-0.000136369
3	A3	4	ILAV (HRP0)	0.0202389	4.40374e-05
3	A3	5	ILAV (HRP0)	0.0203427	0.000135359
3	A3	6	ILAV (HRP0)	0.0204168	0.000197076
3	A3	7	ILAV (HRP0)	0.0203242	9.19998e-05
3	A3	8	ILAV (HRP0)	0.0201041	-0.00014058
3	A3	9	ILAV (HRP0)	0.0199886	-0.000268475
3	A3	10	ILAV (HRP0)	0.0199636	-0.000305918
3	A3	11	ILAV (HRP0)	0.0201775	-0.000104423
3	A3	12	ILAV (HRP0)	0.0204662	0.00017183
3	A3	13	ILAV (HRP0)	0.0204623	0.000155403
3	A3	14	ILAV (HRP0)	0.0203216	2.31164e-06
3	A3	15	ILAV (HRP0)	0.0203685	3.68113e-05
3	A3	16	ILAV (HRP0)	0.0207901	0.000445921
3	A3	17	ILAV (HRP0)	0.0204393	8.26542e-05
3	A3	18	ILAV (HRP0)	0.0201015	-0.000267534
3	A3	19	ILAV (HRP0)	0.0201193	-0.000262176
3	A3	20	ILAV (HRP0)	0.0205137	0.000119744
3	A3	21	ILAV (HRP0)	0.0206128	0.000206458
3	A3	22	ILAV (HRP0)	0.0203855	-3.33209e-05
3	A3	23	ILAV (HRP0)	0.0202604	-0.000170809
3	A3	24	ILAV (HRP0)	0.0202834	-0.000160309
3	A3	25	ILAV (HRP0)	0.0203573	-9.88048e-05
3	A3	26	ILAV (HRP0)	0.0209552	0.00048657
3	A3	27	ILAV (HRP0)	0.0217001	0.00121907
3	A3	28	ILAV (HRP0)	0.0230522	0.00255872
3	A3	29	ILAV (HRP0)	0.0252272	0.00472127
3	A3	30	ILAV (HRP0)	0.0281955	0.0076772
3	A3	31	ILAV (HRP0)	0.0328096	0.0122788
3	A3	32	ILAV (HRP0)	0.0387689	0.0182257
3	A3	33	ILAV (HRP0)	0.0457722	0.0252165
3	A3	34	ILAV (HRP0)	0.0527442	0.0321761
3	A3	35	ILAV (HRP0)	0.0606404	0.0400599
3	A3	36	ILAV (HRP0)	0.0683285	0.0477355
3	A3	37	ILAV (HRP0)	0.0755975	0.0549921
3	A3	38	ILAV (HRP0)	0.0830574	0.0624396
3	A3	39	ILAV (HRP0)	0.0896112	0.0689809
3	A3	40	ILAV (HRP0)	0.0963814	0.0757387
3	A3	41	ILAV (HRP0)	0.102833	0.0821782
3	A3	42	ILAV (HRP0)	0.108527	0.0878596
3	A3	43	ILAV (HRP0)	0.113286	0.0926059
3	A3	44	ILAV (HRP0)	0.1174	0.0967078
3	A3	45	ILAV (HRP0)	0.119467	0.0987625
4	A4	1
4	A4	2
4	A4	3
4	A4	4
4	A4	5
4	A4	6
4	A4	7
4	A4	8
4	A4	9
4	A4	10
4	A4	11
4	A4	12
4	A4	13
4	A4	14
4	A4	15
4	A4	16
4	A4	17
4	A4	18
4	A4	19
4	A4	20
4	A4	21
4	A4	22
4	A4	23
4	A4	24
4	A4	25
4	A4	26
4	A4	27
4	A4	28
4	A4	29
4	A4	30
4	A4	31
4	A4	32
4	A4	33
4	A4	34
4	A4	35
4	A4	36
4	A4	37
4	A4	38
4	A4	39
4	A4	40
4	A4	41
4	A4	42
4	A4	43
4	A4	44
4	A4	45
5	A5	1
5	A5	2
5	A5	3
5	A5	4
5	A5	5
5	A5	6
5	A5	7
5	A5	8
5	A5	9
5	A5	10
5	A5	11
5	A5	12
5	A5	13
5	A5	14
5	A5	15
5	A5	16
5	A5	17
5	A5	18
5	A5	19
5	A5	20
5	A5	21
5	A5	22
5	A5	23
5	A5	24
5	A5	25
5	A5	26
5	A5	27
5	A5	28
5	A5	29
5	A5	30
5	A5	31
5	A5	32
5	A5	33
5	A5	34
5	A5	35
5	A5	36
5	A5	37
5	A5	38
5	A5	39
5	A5	40
5	A5	41
5	A5	42
5	A5	43
5	A5	44
5	A5	45
6	A6	1
6	A6	2
6	A6	3
6	A6	4
6	A6	5
6	A6	6
6	A6	7
6	A6	8
6	A6	9
6	A6	10
6	A6	11
6	A6	12
6	A6	13
6	A6	14
6	A6	15
6	A6	16
6	A6	17
6	A6	18
6	A6	19
6	A6	20
6	A6	21
6	A6	22
6	A6	23
6	A6	24
6	A6	25
6	A6	26
6	A6	27
6	A6	28
6	A6	29
6	A6	30
6	A6	31
6	A6	32
6	A6	33
6	A6	34
6	A6	35
6	A6	36
6	A6	37
6	A6	38
6	A6	39
6	A6	40
6	A6	41
6	A6	42
6	A6	43
6	A6	44
6	A6	45
7	A7	1
7	A7	2
7	A7	3
7	A7	4
7	A7	5
7	A7	6
7	A7	7
7	A7	8
7	A7	9
7	A7	10
7	A7	11
7	A7	12
7	A7	13
7	A7	14
7	A7	15
7	A7	16
7	A7	17
7	A7	18
7	A7	19
7	A7	20
7	A7	21
7	A7	22
7	A7	23
7	A7	24
7	A7	25
7	A7	26
7	A7	27
7	A7	28
7	A7	29
7	A7	30
7	A7	31
7	A7	32
7	A7	33
7	A7	34
7	A7	35
7	A7	36
7	A7	37
7	A7	38
7	A7	39
7	A7	40
7	A7	41
7	A7	42
7	A7	43
7	A7	44
7	A7	45
8	A8	1
8	A8	2
8	A8	3
8	A8	4
8	A8	5
8	A8	6
8	A8	7
8	A8	8
8	A8	9
8	A8	10
8	A8	11
8	A8	12
8	A8	13
8	A8	14
8	A8	15
8	A8	16
8	A8	17
8	A8	18
8	A8	19
8	A8	20
8	A8	21
8	A8	22
8	A8	23
8	A8	24
8	A8	25
8	A8	26
8	A8	27
8	A8	28
8	A8	29
8	A8	30
8	A8	31
8	A8	32
8	A8	33
8	A8	34
8	A8	35
8	A8	36
8	A8	37
8	A8	38
8	A8	39
8	A8	40
8	A8	41
8	A8	42
8	A8	43
8	A8	44
8	A8	45
9	A9	1
9	A9	2
9	A9	3
9	A9	4
9	A9	5
9	A9	6
9	A9	7
9	A9	8
9	A9	9
9	A9	10
9	A9	11
9	A9	12
9	A9	13
9	A9	14
9	A9	15
9	A9	16
9	A9	17
9	A9	18
9	A9	19
9	A9	20
9	A9	21
9	A9	22
9	A9	23
9	A9	24
9	A9	25
9	A9	26
9	A9	27
9	A9	28
9	A9	29
9	A9	30
9	A9	31
9	A9	32
9	A9	33
9	A9	34
9	A9	35
9	A9	36
9	A9	37
9	A9	38
9	A9	39
9	A9	40
9	A9	41
9	A9	42
9	A9	43
9	A9	44
9	A9	45
10	A10	1
10	A10	2
10	A10	3
10	A10	4
10	A10	5
10	A10	6
10	A10	7
10	A10	8
10	A10	9
10	A10	10
10	A10	11
10	A10	12
10	A10	13
10	A10	14
10	A10	15
10	A10	16
10	A10	17
10	A10	18
10	A10	19
10	A10	20
10	A10	21
10	A10	22
10	A10	23
10	A10	24
10	A10	25
10	A10	26
10	A10	27
10	A10	28
10	A10	29
10	A10	30
10	A10	31
10	A10	32
10	A10	33
10	A10	34
10	A10	35
10	A10	36
10	A10	37
10	A10	38
10	A10	39
10	A10	40
10	A10	41
10	A10	42
10	A10	43
10	A10	44
10	A10	45
11	A11	1
11	A11	2
11	A11	3
11	A11	4
11	A11	5
11	A11	6
11	A11	7
11	A11	8
11	A11	9
11	A11	10
11	A11	11
11	A11	12
11	A11	13
11	A11	14
11	A11	15
11	A11	16
11	A11	17
11	A11	18
11	A11	19
11	A11	20
11	A11	21
11	A11	22
11	A11	23
11	A11	24
11	A11	25
11	A11	26
11	A11	27
11	A11	28
11	A11	29
11	A11	30
11	A11	31
11	A11	32
11	A11	33
11	A11	34
11	A11	35
11	A11	36
11	A11	37
11	A11	38
11	A11	39
11	A11	40
11	A11	41
11	A11	42
11	A11	43
11	A11	44
11	A11	45
12	A12	1
12	A12	2
12	A12	3
12	A12	4
12	A12	5
12	A12	6
12	A12	7
12	A12	8
12	A12	9
12	A12	10
12	A12	11
12	A12	12
12	A12	13
12	A12	14
12	A12	15
12	A12	16
12	A12	17
12	A12	18
12	A12	19
12	A12	20
12	A12	21
12	A12	22
12	A12	23
12	A12	24
12	A12	25
12	A12	26
12	A12	27
12	A12	28
12	A12	29
12	A12	30
12	A12	31
12	A12	32
12	A12	33
12	A12	34
12	A12	35
12	A12	36
12	A12	37
12	A12	38
12	A12	39
12	A12	40
12	A12	41
12	A12	42
12	A12	43
12	A12	44
12	A12	45
13	B1	1	ILAV (HRP0)	0.0210935	0.000256767
13	B1	2	ILAV (HRP0)	0.0210026	0.000236283
13	B1	3	ILAV (HRP0)	0.020661	-3.48909e-05
13	B1	4	ILAV (HRP0)	0.020173	-0.000452366
13	B1	5	ILAV (HRP0)	0.0200492	-0.000505815
13	B1	6	ILAV (HRP0)	0.0202416	-0.000242965
13	B1	7	ILAV (HRP0)	0.0203174	-9.67483e-05
13	B1	8	ILAV (HRP0)	0.0203482	4.53049e-06
13	B1	9	ILAV (HRP0)	0.0204019	0.000128675
13	B1	10	ILAV (HRP0)	0.0208177	0.000614866
13	B1	11	ILAV (HRP0)	0.0207658	0.000633363
13	B1	12	ILAV (HRP0)	0.0205823	0.000520305
13	B1	13	ILAV (HRP0)	0.0201993	0.000207798
13	B1	14	ILAV (HRP0)	0.0198549	-6.62168e-05
13	B1	15	ILAV (HRP0)	0.0198143	-3.63761e-05
13	B1	16	ILAV (HRP0)	0.02005	0.000269794
13	B1	17	ILAV (HRP0)	0.019771	6.11824e-05
13	B1	18	ILAV (HRP0)	0.0195387	-0.000100714
13	B1	19	ILAV (HRP0)	0.0193029	-0.000265996
13	B1	20	ILAV (HRP0)	0.0192842	-0.00021429
13	B1	21	ILAV (HRP0)	0.0193679	-6.01959e-05
13	B1	22	ILAV (HRP0)	0.0191313	-0.000226393
13	B1	23	ILAV (HRP0)	0.0191497	-0.000137545
13	B1	24	ILAV (HRP0)	0.0195403	0.000323516
13	B1	25	ILAV (HRP0)	0.0198302	0.000683893
13	B1	26	ILAV (HRP0)	0.0198622	0.000786304
13	B1	27	ILAV (HRP0)	0.019919	0.000913554
13	B1	28	ILAV (HRP0)	0.0196572	0.00072217
13	B1	29	ILAV (HRP0)	0.019895	0.00103035
13	B1	30	ILAV (HRP0)	0.0216139	0.00281972
13	B1	31	ILAV (HRP0)	0.0237731	0.00504932
13	B1	32	ILAV (HRP0)	0.0262657	0.00761235
13	B1	33	ILAV (HRP0)	0.0309497	0.0123668
13	B1	34	ILAV (HRP0)	0.0372724	0.0187599
13	B1	35	ILAV (HRP0)	0.0433267	0.0248847
13	B1	36	ILAV (HRP0)	0.0506452	0.0322736
13	B1	37	ILAV (HRP0)	0.0592886	0.0409874
13	B1	38	ILAV (HRP0)	0.067225	0.0489942
13	B1	39	ILAV (HRP0)	0.0751266	0.0569663
13	B1	40	ILAV (HRP0)	0.0832261	0.0651362
13	B1	41	ILAV (HRP0)	0.0908713	0.0728519
13	B1	42	ILAV (HRP0)	0.0985075	0.0805585
13	B1	43	ILAV (HRP0)	0.106027	0.0881484
13	B1	44	ILAV (HRP0)	0.112962	0.0951534
13	B1	45	ILAV (HRP0)	0.117845	0.100108
14	B2	1	ILAV (HRP0)	0.0228973	0.000687594
14	B2	2	ILAV (HRP0)	0.0228055	0.000655862
14	B2	3	ILAV (HRP0)	0.0223504	0.000260909
14	B2	4	ILAV (HRP0)	0.0221913	0.000161838
14	B2	5	ILAV (HRP0)	0.0224065	0.000437139
14	B2	6	ILAV (HRP0)	0.0221907	0.000281396
14	B2	7	ILAV (HRP0)	0.021956	0.000106801
14	B2	8	ILAV (HRP0)	0.0215778	-0.000211317
14	B2	9	ILAV (HRP0)	0.0214305	-0.00029849
14	B2	10	ILAV (HRP0)	0.0214548	-0.00021418
14	B2	11	ILAV (HRP0)	0.0216072	-1.67241e-06
14	B2	12	ILAV (HRP0)	0.0214026	-0.000146124
14	B2	13	ILAV (HRP0)	0.0212599	-0.000228796
14	B2	14	ILAV (HRP0)	0.0211977	-0.000230927
14	B2	15	ILAV (HRP0)	0.0209729	-0.000395629
14	B2	16	ILAV (HRP0)	0.0209582	-0.000350216
14	B2	17	ILAV (HRP0)	0.0210044	-0.000243967
14	B2	18	ILAV (HRP0)	0.0209626	-0.000225639
14	B2	19	ILAV (HRP0)	0.0211868	5.86249e-05
14	B2	20	ILAV (HRP0)	0.0212186	0.000150505
14	B2	21	ILAV (HRP0)	0.0212491	0.000241034
14	B2	22	ILAV (HRP0)	0.0214609	0.000513011
14	B2	23	ILAV (HRP0)	0.0212236	0.000335701
14	B2	24	ILAV (HRP0)	0.0207203	-0.000107505
14	B2	25	ILAV (HRP0)	0.0207562	-1.14946e-05
14	B2	26	ILAV (HRP0)	0.021351	0.000643445
14	B2	27	ILAV (HRP0)	0.0218481	0.00120053
14	B2	28	ILAV (HRP0)	0.0221316	0.00154415
14	B2	29	ILAV (HRP0)	0.022483	0.00195568
14	B2	30	ILAV (HRP0)	0.0234449	0.00297763
14	B2	31	ILAV (HRP0)	0.024753	0.0043458
14	B2	32	ILAV (HRP0)	0.0274054	0.00705831
14	B2	33	ILAV (HRP0)	0.031056	0.010769
14	B2	34	ILAV (HRP0)	0.0362585	0.0160316
14	B2	35	ILAV (HRP0)	0.0427755	0.0226086
14	B2	36	ILAV (HRP0)	0.0509171	0.0308104
14	B2	37	ILAV (HRP0)	0.0583704	0.0383238
14	B2	38	ILAV (HRP0)	0.0653355	0.0453489
14	B2	39	ILAV (HRP0)	0.0739468	0.0540202
14	B2	40	ILAV (HRP0)	0.081978	0.0621116
14	B2	41	ILAV (HRP0)	0.0895031	0.0696967
14	B2	42	ILAV (HRP0)	0.0966277	0.0768815
14	B2	43	ILAV (HRP0)	0.103812	0.0841255
14	B2	44	ILAV (HRP0)	0.11059	0.0909636
14	B2	45	ILAV (HRP0)	0.116737	0.0971708
15	B3	1	ILAV (HRP0)	0.0246705	0.000420945
15	B3	2	ILAV (HRP0)	0.024654	0.000456794
15	B3	3	ILAV (HRP0)	0.0247919	0.000647029
15	B3	4	ILAV (HRP0)	0.0245773	0.000484796
15	B3	5	ILAV (HRP0)	0.0242647	0.000224532
15	B3	6	ILAV (HRP0)	0.0238363	-0.000151548
15	B3	7	ILAV (HRP0)	0.023606	-0.000329448
15	B3	8	ILAV (HRP0)	0.023498	-0.000385095
15	B3	9	ILAV (HRP0)	0.0235938	-0.000236971
15	B3	10	ILAV (HRP0)	0.0239682	0.000189772
15	B3	11	ILAV (HRP0)	0.0234284	-0.000297685
15	B3	12	ILAV (HRP0)	0.0232415	-0.000432176
15	B3	13	ILAV (HRP0)	0.0232785	-0.000342859
15	B3	14	ILAV (HRP0)	0.0232937	-0.000275277
15	B3	15	ILAV (HRP0)	0.0235622	4.55501e-05
15	B3	16	ILAV (HRP0)	0.0236575	0.000193192
15	B3	17	ILAV (HRP0)	0.0234875	7.55729e-05
15	B3	18	ILAV (HRP0)	0.0233638	4.20688e-06
15	B3	19	ILAV (HRP0)	0.0232858	-2.14647e-05
15	B3	20	ILAV (HRP0)	0.0232535	-1.34499e-06
15	B3	21	ILAV (HRP0)	0.0232866	8.40288e-05
15	B3	22	ILAV (HRP0)	0.0233942	0.000244005
15	B3	23	ILAV (HRP0)	0.023379	0.000281181
15	B3	24	ILAV (HRP0)	0.023559	0.000513518
15	B3	25	ILAV (HRP0)	0.0236786	0.000685454
15	B3	26	ILAV (HRP0)	0.0233446	0.000403849
15	B3	27	ILAV (HRP0)	0.0233	0.000411633
15	B3	28	ILAV (HRP0)	0.0238	0.00096394
15	B3	29	ILAV (HRP0)	0.0247353	0.00195161
15	B3	30	ILAV (HRP0)	0.0260092	0.00327781
15	B3	31	ILAV (HRP0)	0.0276981	0.00501914
15	B3	32	ILAV (HRP0)	0.0305172	0.00789054
15	B3	33	ILAV (HRP0)	0.0351555	0.0125812
15	B3	34	ILAV (HRP0)	0.040859	0.0183371
15	B3	35	ILAV (HRP0)	0.047972	0.0255024
15	B3	36	ILAV (HRP0)	0.0559535	0.0335363
15	B3	37	ILAV (HRP0)	0.0644711	0.0421062
15	B3	38	ILAV (HRP0)	0.072749	0.0504364
15	B3	39	ILAV (HRP0)	0.0809055	0.0586454
15	B3	40	ILAV (HRP0)	0.089523	0.0673151
15	B3	41	ILAV (HRP0)	0.0978251	0.0756696
15	B3	42	ILAV (HRP0)	0.105666	0.0835626
15	B3	43	ILAV (HRP0)	0.11324	0.0911888
15	B3	44	ILAV (HRP0)	0.119841	0.0978428
15	B3	45	ILAV (HRP0)	0.125728	0.103782
16	B4	1
16	B4	2
16	B4	3
16	B4	4
16	B4	5
16	B4	6
16	B4	7
16	B4	8
16	B4	9
16	B4	10
16	B4	11
16	B4	12
16	B4	13
16	B4	14
16	B4	15
16	B4	16
16	B4	17
16	B4	18
16	B4	19
16	B4	20
16	B4	21
16	B4	22
16	B4	23
16	B4	24
16	B4	25
16	B4	26
16	B4	27
16	B4	28
16	B4	29
16	B4	30
16	B4	31
16	B4	32
16	B4	33
16	B4	34
16	B4	35
16	B4	36
16	B4	37
16	B4	38
16	B4	39
16	B4	40
16	B4	41
16	B4	42
16	B4	43
16	B4	44
16	B4	45
17	B5	1
17	B5	2
17	B5	3
17	B5	4
17	B5	5
17	B5	6
17	B5	7
17	B5	8
17	B5	9
17	B5	10
17	B5	11
17	B5	12
17	B5	13
17	B5	14
17	B5	15
17	B5	16
17	B5	17
17	B5	18
17	B5	19
17	B5	20
17	B5	21
17	B5	22
17	B5	23
17	B5	24
17	B5	25
17	B5	26
17	B5	27
17	B5	28
17	B5	29
17	B5	30
17	B5	31
17	B5	32
17	B5	33
17	B5	34
17	B5	35
17	B5	36
17	B5	37
17	B5	38
17	B5	39
17	B5	40
17	B5	41
17	B5	42
17	B5	43
17	B5	44
17	B5	45
18	B6	1
18	B6	2
18	B6	3
18	B6	4
18	B6	5
18	B6	6
18	B6	7
18	B6	8
18	B6	9
18	B6	10
18	B6	11
18	B6	12
18	B6	13
18	B6	14
18	B6	15
18	B6	16
18	B6	17
18	B6	18
18	B6	19
18	B6	20
18	B6	21
18	B6	22
18	B6	23
18	B6	24
18	B6	25
18	B6	26
18	B6	27
18	B6	28
18	B6	29
18	B6	30
18	B6	31
18	B6	32
18	B6	33
18	B6	34
18	B6	35
18	B6	36
18	B6	37
18	B6	38
18	B6	39
18	B6	40
18	B6	41
18	B6	42
18	B6	43
18	B6	44
18	B6	45
19	B7	1
19	B7	2
19	B7	3
19	B7	4
19	B7	5
19	B7	6
19	B7	7
19	B7	8
19	B7	9
19	B7	10
19	B7	11
19	B7	12
19	B7	13
19	B7	14
19	B7	15
19	B7	16
19	B7	17
19	B7	18
19	B7	19
19	B7	20
19	B7	21
19	B7	22
19	B7	23
19	B7	24
19	B7	25
19	B7	26
19	B7	27
19	B7	28
19	B7	29
19	B7	30
19	B7	31
19	B7	32
19	B7	33
19	B7	34
19	B7	35
19	B7	36
19	B7	37
19	B7	38
19	B7	39
19	B7	40
19	B7	41
19	B7	42
19	B7	43
19	B7	44
19	B7	45
20	B8	1
20	B8	2
20	B8	3
20	B8	4
20	B8	5
20	B8	6
20	B8	7
20	B8	8
20	B8	9
20	B8	10
20	B8	11
20	B8	12
20	B8	13
20	B8	14
20	B8	15
20	B8	16
20	B8	17
20	B8	18
20	B8	19
20	B8	20
20	B8	21
20	B8	22
20	B8	23
20	B8	24
20	B8	25
20	B8	26
20	B8	27
20	B8	28
20	B8	29
20	B8	30
20	B8	31
20	B8	32
20	B8	33
20	B8	34
20	B8	35
20	B8	36
20	B8	37
20	B8	38
20	B8	39
20	B8	40
20	B8	41
20	B8	42
20	B8	43
20	B8	44
20	B8	45
21	B9	1
21	B9	2
21	B9	3
21	B9	4
21	B9	5
21	B9	6
21	B9	7
21	B9	8
21	B9	9
21	B9	10
21	B9	11
21	B9	12
21	B9	13
21	B9	14
21	B9	15
21	B9	16
21	B9	17
21	B9	18
21	B9	19
21	B9	20
21	B9	21
21	B9	22
21	B9	23
21	B9	24
21	B9	25
21	B9	26
21	B9	27
21	B9	28
21	B9	29
21	B9	30
21	B9	31
21	B9	32
21	B9	33
21	B9	34
21	B9	35
21	B9	36
21	B9	37
21	B9	38
21	B9	39
21	B9	40
21	B9	41
21	B9	42
21	B9	43
21	B9	44
21	B9	45
22	B10	1
22	B10	2
22	B10	3
22	B10	4
22	B10	5
22	B10	6
22	B10	7
22	B10	8
22	B10	9
22	B10	10
22	B10	11
22	B10	12
22	B10	13
22	B10	14
22	B10	15
22	B10	16
22	B10	17
22	B10	18
22	B10	19
22	B10	20
22	B10	21
22	B10	22
22	B10	23
22	B10	24
22	B10	25
22	B10	26
22	B10	27
22	B10	28
22	B10	29
22	B10	30
22	B10	31
22	B10	32
22	B10	33
22	B10	34
22	B10	35
22	B10	36
22	B10	37
22	B10	38
22	B10	39
22	B10	40
22	B10	41
22	B10	42
22	B10	43
22	B10	44
22	B10	45
23	B11	1
23	B11	2
23	B11	3
23	B11	4
23	B11	5
23	B11	6
23	B11	7
23	B11	8
23	B11	9
23	B11	10
23	B11	11
23	B11	12
23	B11	13
23	B11	14
23	B11	15
23	B11	16
23	B11	17
23	B11	18
23	B11	19
23	B11	20
23	B11	21
23	B11	22
23	B11	23
23	B11	24
23	B11	25
23	B11	26
23	B11	27
23	B11	28
23	B11	29
23	B11	30
23	B11	31
23	B11	32
23	B11	33
23	B11	34
23	B11	35
23	B11	36
23	B11	37
23	B11	38
23	B11	39
23	B11	40
23	B11	41
23	B11	42
23	B11	43
23	B11	44
23	B11	45
24	B12	1
24	B12	2
24	B12	3
24	B12	4
24	B12	5
24	B12	6
24	B12	7
24	B12	8
24	B12	9
24	B12	10
24	B12	11
24	B12	12
24	B12	13
24	B12	14
24	B12	15
24	B12	16
24	B12	17
24	B12	18
24	B12	19
24	B12	20
24	B12	21
24	B12	22
24	B12	23
24	B12	24
24	B12	25
24	B12	26
24	B12	27
24	B12	28
24	B12	29
24	B12	30
24	B12	31
24	B12	32
24	B12	33
24	B12	34
24	B12	35
24	B12	36
24	B12	37
24	B12	38
24	B12	39
24	B12	40
24	B12	41
24	B12	42
24	B12	43
24	B12	44
24	B12	45
25	C1	1	ILAV (HRP0)	0.022251	0.000284131
25	C1	2	ILAV (HRP0)	0.022186	0.000309047
25	C1	3	ILAV (HRP0)	0.0222425	0.00045546
25	C1	4	ILAV (HRP0)	0.0220417	0.000344609
25	C1	5	ILAV (HRP0)	0.0217211	0.000113948
25	C1	6	ILAV (HRP0)	0.0214566	-6.06564e-05
25	C1	7	ILAV (HRP0)	0.0210266	-0.000400772
25	C1	8	ILAV (HRP0)	0.0208351	-0.000502337
25	C1	9	ILAV (HRP0)	0.0209151	-0.000332453
25	C1	10	ILAV (HRP0)	0.0208429	-0.000314706
25	C1	11	ILAV (HRP0)	0.0208521	-0.000215647
25	C1	12	ILAV (HRP0)	0.0209348	-4.30475e-05
25	C1	13	ILAV (HRP0)	0.0213888	0.000500859
25	C1	14	ILAV (HRP0)	0.0213416	0.000543609
25	C1	15	ILAV (HRP0)	0.0210177	0.000309641
25	C1	16	ILAV (HRP0)	0.0203954	-0.000222792
25	C1	17	ILAV (HRP0)	0.0202181	-0.00031017
25	C1	18	ILAV (HRP0)	0.0205029	6.46054e-05
25	C1	19	ILAV (HRP0)	0.020611	0.00026261
25	C1	20	ILAV (HRP0)	0.0200464	-0.000212132
25	C1	21	ILAV (HRP0)	0.019885	-0.000283578
25	C1	22	ILAV (HRP0)	0.0200287	-5.00215e-05
25	C1	23	ILAV (HRP0)	0.0203417	0.000352971
25	C1	24	ILAV (HRP0)	0.0205174	0.000618507
25	C1	25	ILAV (HRP0)	0.0203503	0.000541304
25	C1	26	ILAV (HRP0)	0.0202298	0.000510767
25	C1	27	ILAV (HRP0)	0.0203087	0.000679599
25	C1	28	ILAV (HRP0)	0.0203736	0.000834395
25	C1	29	ILAV (HRP0)	0.0207862	0.00133689
25	C1	30	ILAV (HRP0)	0.0211104	0.00175097
25	C1	31	ILAV (HRP0)	0.0212258	0.0019563
25	C1	32	ILAV (HRP0)	0.0220088	0.00282926
25	C1	33	ILAV (HRP0)	0.0235009	0.0044112
25	C1	34	ILAV (HRP0)	0.0265281	0.00752832
25	C1	35	ILAV (HRP0)	0.0302526	0.0113427
25	C1	36	ILAV (HRP0)	0.0354647	0.0166447
25	C1	37	ILAV (HRP0)	0.041753	0.023023
25	C1	38	ILAV (HRP0)	0.0494529	0.0308128
25	C1	39	ILAV (HRP0)	0.0572693	0.0387191
25	C1	40	ILAV (HRP0)	0.0648299	0.0463696
25	C1	41	ILAV (HRP0)	0.0730295	0.0546591
25	C1	42	ILAV (HRP0)	0.0810476	0.0627671
25	C1	43	ILAV (HRP0)	0.0884608	0.0702702
25	C1	44	ILAV (HRP0)	0.0963501	0.0782494
25	C1	45	ILAV (HRP0)	0.101983	0.0839722
26	C2	1	ILAV (HRP0)	0.0251398	0.000903827
26	C2	2	ILAV (HRP0)	0.0248283	0.000625455
26	C2	3	ILAV (HRP0)	0.024439	0.000269116
26	C2	4	ILAV (HRP0)	0.0243843	0.000247519
26	C2	5	ILAV (HRP0)	0.0243225	0.000218756
26	C2	6	ILAV (HRP0)	0.0242797	0.000209
26	C2	7	ILAV (HRP0)	0.0237365	-0.000301201
26	C2	8	ILAV (HRP0)	0.0235581	-0.000446531
26	C2	9	ILAV (HRP0)	0.0237324	-0.000239262
26	C2	10	ILAV (HRP0)	0.023875	-6.36174e-05
26	C2	11	ILAV (HRP0)	0.0238618	-4.37232e-05
26	C2	12	ILAV (HRP0)	0.0240593	0.000186769
26	C2	13	ILAV (HRP0)	0.0239666	0.000127162
26	C2	14	ILAV (HRP0)	0.0237249	-8.1526e-05
26	C2	15	ILAV (HRP0)	0.0236216	-0.000151823
26	C2	16	ILAV (HRP0)	0.0236016	-0.000138753
26	C2	17	ILAV (HRP0)	0.0235586	-0.000148701
26	C2	18	ILAV (HRP0)	0.023379	-0.000295288
26	C2	19	ILAV (HRP0)	0.0234201	-0.000221129
26	C2	20	ILAV (HRP0)	0.0238233	0.000215049
26	C2	21	ILAV (HRP0)	0.0238704	0.000295191
26	C2	22	ILAV (HRP0)	0.0237961	0.000253914
26	C2	23	ILAV (HRP0)	0.0236182	0.000109079
26	C2	24	ILAV (HRP0)	0.0234753	-7.70834e-07
26	C2	25	ILAV (HRP0)	0.0232801	-0.000162937
26	C2	26	ILAV (HRP0)	0.0232684	-0.000141583
26	C2	27	ILAV (HRP0)	0.0236123	0.000235341
26	C2	28	ILAV (HRP0)	0.0236513	0.000307403
26	C2	29	ILAV (HRP0)	0.023647	0.000336113
26	C2	30	ILAV (HRP0)	0.02378	0.000502195
26	C2	31	ILAV (HRP0)	0.0245857	0.00134085
26	C2	32	ILAV (HRP0)	0.0255447	0.00233289
26	C2	33	ILAV (HRP0)	0.0275023	0.00432355
26	C2	34	ILAV (HRP0)	0.0306622	0.00751649
26	C2	35	ILAV (HRP0)	0.0343797	0.0112671
26	C2	36	ILAV (HRP0)	0.0401691	0.0170895
26	C2	37	ILAV (HRP0)	0.0473772	0.0243306
26	C2	38	ILAV (HRP0)	0.0556275	0.0326139
26	C2	39	ILAV (HRP0)	0.0635524	0.0405719
26	C2	40	ILAV (HRP0)	0.0716822	0.0487347
26	C2	41	ILAV (HRP0)	0.0793223	0.0564079
26	C2	42	ILAV (HRP0)	0.0876372	0.0647558
26	C2	43	ILAV (HRP0)	0.0957332	0.0728848
26	C2	44	ILAV (HRP0)	0.104161	0.0813454
26	C2	45	ILAV (HRP0)	0.110187	0.0874045
27	C3	1	ILAV (HRP0)	0.0288657	0.000897471
27	C3	2	ILAV (HRP0)	0.0288432	0.000934052
27	C3	3	ILAV (HRP0)	0.0283063	0.000456209
27	C3	4	ILAV (HRP0)	0.0279791	0.000188125
27	C3	5	ILAV (HRP0)	0.0280337	0.000301847
27	C3	6	ILAV (HRP0)	0.0278948	0.00022203
27	C3	7	ILAV (HRP0)	0.0278129	0.000199202
27	C3	8	ILAV (HRP0)	0.0277255	0.000170938
27	C3	9	ILAV (HRP0)	0.0274904	-5.09991e-06
27	C3	10	ILAV (HRP0)	0.026828	-0.00060838
27	C3	11	ILAV (HRP0)	0.026738	-0.00063925
27	C3	12	ILAV (HRP0)	0.0270989	-0.000219292
27	C3	13	ILAV (HRP0)	0.0270437	-0.000215363
27	C3	14	ILAV (HRP0)	0.0268726	-0.000327414
27	C3	15	ILAV (HRP0)	0.0267282	-0.000412653
27	C3	16	ILAV (HRP0)	0.0269012	-0.000180599
27	C3	17	ILAV (HRP0)	0.0269352	-8.74924e-05
27	C3	18	ILAV (HRP0)	0.0268368	-0.000126792
27	C3	19	ILAV (HRP0)	0.0268482	-5.63071e-05
27	C3	20	ILAV (HRP0)	0.0268961	5.06967e-05
27	C3	21	ILAV (HRP0)	0.0271951	0.000408845
27	C3	22	ILAV (HRP0)	0.0272132	0.000486059
27	C3	23	ILAV (HRP0)	0.0270628	0.00039469
27	C3	24	ILAV (HRP0)	0.026734	0.000125081
27	C3	25	ILAV (HRP0)	0.0266527	0.000102821
27	C3	26	ILAV (HRP0)	0.0266192	0.000128485
27	C3	27	ILAV (HRP0)	0.0264246	-7.02914e-06
27	C3	28	ILAV (HRP0)	0.0264466	7.39982e-05
27	C3	29	ILAV (HRP0)	0.0269663	0.000652804
27	C3	30	ILAV (HRP0)	0.0273549	0.0011005
27	C3	31	ILAV (HRP0)	0.0278065	0.00161121
27	C3	32	ILAV (HRP0)	0.0287307	0.00259458
27	C3	33	ILAV (HRP0)	0.0301844	0.00410736
27	C3	34	ILAV (HRP0)	0.0337502	0.00773223
27	C3	35	ILAV (HRP0)	0.0373565	0.0113976
27	C3	36	ILAV (HRP0)	0.0434061	0.0175064
27	C3	37	ILAV (HRP0)	0.0508944	0.0250537
27	C3	38	ILAV (HRP0)	0.0585032	0.0327217
27	C3	39	ILAV (HRP0)	0.0661788	0.0404564
27	C3	40	ILAV (HRP0)	0.0745292	0.0488659
27	C3	41	ILAV (HRP0)	0.0823696	0.0567653
27	C3	42	ILAV (HRP0)	0.0901615	0.0646164
27	C3	43	ILAV (HRP0)	0.098035	0.072549
27	C3	44	ILAV (HRP0)	0.105904	0.0804769
27	C3	45	ILAV (HRP0)	0.11218	0.0868126
28	C4	1
28	C4	2
28	C4	3
28	C4	4
28	C4	5
28	C4	6
28	C4	7
28	C4	8
28	C4	9
28	C4	10
28	C4	11
28	C4	12
28	C4	13
28	C4	14
28	C4	15
28	C4	16
28	C4	17
28	C4	18
28	C4	19
28	C4	20
28	C4	21
28	C4	22
28	C4	23
28	C4	24
28	C4	25
28	C4	26
28	C4	27
28	C4	28
28	C4	29
28	C4	30
28	C4	31
28	C4	32
28	C4	33
28	C4	34
28	C4	35
28	C4	36
28	C4	37
28	C4	38
28	C4	39
28	C4	40
28	C4	41
28	C4	42
28	C4	43
28	C4	44
28	C4	45
29	C5	1
29	C5	2
29	C5	3
29	C5	4
29	C5	5
29	C5	6
29	C5	7
29	C5	8
29	C5	9
29	C5	10
29	C5	11
29	C5	12
29	C5	13
29	C5	14
29	C5	15
29	C5	16
29	C5	17
29	C5	18
29	C5	19
29	C5	20
29	C5	21
29	C5	22
29	C5	23
29	C5	24
29	C5	25
29	C5	26
29	C5	27
29	C5	28
29	C5	29
29	C5	30
29	C5	31
29	C5	32
29	C5	33
29	C5	34
29	C5	35
29	C5	36
29	C5	37
29	C5	38
29	C5	39
29	C5	40
29	C5	41
29	C5	42
29	C5	43
29	C5	44
29	C5	45
30	C6	1
30	C6	2
30	C6	3
30	C6	4
30	C6	5
30	C6	6
30	C6	7
30	C6	8
30	C6	9
30	C6	10
30	C6	11
30	C6	12
30	C6	13
30	C6	14
30	C6	15
30	C6	16
30	C6	17
30	C6	18
30	C6	19
30	C6	20
30	C6	21
30	C6	22
30	C6	23
30	C6	24
30	C6	25
30	C6	26
30	C6	27
30	C6	28
30	C6	29
30	C6	30
30	C6	31
30	C6	32
30	C6	33
30	C6	34
30	C6	35
30	C6	36
30	C6	37
30	C6	38
30	C6	39
30	C6	40
30	C6	41
30	C6	42
30	C6	43
30	C6	44
30	C6	45
31	C7	1
31	C7	2
31	C7	3
31	C7	4
31	C7	5
31	C7	6
31	C7	7
31	C7	8
31	C7	9
31	C7	10
31	C7	11
31	C7	12
31	C7	13
31	C7	14
31	C7	15
31	C7	16
31	C7	17
31	C7	18
31	C7	19
31	C7	20
31	C7	21
31	C7	22
31	C7	23
31	C7	24
31	C7	25
31	C7	26
31	C7	27
31	C7	28
31	C7	29
31	C7	30
31	C7	31
31	C7	32
31	C7	33
31	C7	34
31	C7	35
31	C7	36
31	C7	37
31	C7	38
31	C7	39
31	C7	40
31	C7	41
31	C7	42
31	C7	43
31	C7	44
31	C7	45
32	C8	1
32	C8	2
32	C8	3
32	C8	4
32	C8	5
32	C8	6
32	C8	7
32	C8	8
32	C8	9
32	C8	10
32	C8	11
32	C8	12
32	C8	13
32	C8	14
32	C8	15
32	C8	16
32	C8	17
32	C8	18
32	C8	19
32	C8	20
32	C8	21
32	C8	22
32	C8	23
32	C8	24
32	C8	25
32	C8	26
32	C8	27
32	C8	28
32	C8	29
32	C8	30
32	C8	31
32	C8	32
32	C8	33
32	C8	34
32	C8	35
32	C8	36
32	C8	37
32	C8	38
32	C8	39
32	C8	40
32	C8	41
32	C8	42
32	C8	43
32	C8	44
32	C8	45
33	C9	1
33	C9	2
33	C9	3
33	C9	4
33	C9	5
33	C9	6
33	C9	7
33	C9	8
33	C9	9
33	C9	10
33	C9	11
33	C9	12
33	C9	13
33	C9	14
33	C9	15
33	C9	16
33	C9	17
33	C9	18
33	C9	19
33	C9	20
33	C9	21
33	C9	22
33	C9	23
33	C9	24
33	C9	25
33	C9	26
33	C9	27
33	C9	28
33	C9	29
33	C9	30
33	C9	31
33	C9	32
33	C9	33
33	C9	34
33	C9	35
33	C9	36
33	C9	37
33	C9	38
33	C9	39
33	C9	40
33	C9	41
33	C9	42
33	C9	43
33	C9	44
33	C9	45
34	C10	1
34	C10	2
34	C10	3
34	C10	4
34	C10	5
34	C10	6
34	C10	7
34	C10	8
34	C10	9
34	C10	10
34	C10	11
34	C10	12
34	C10	13
34	C10	14
34	C10	15
34	C10	16
34	C10	17
34	C10	18
34	C10	19
34	C10	20
34	C10	21
34	C10	22
34	C10	23
34	C10	24
34	C10	25
34	C10	26
34	C10	27
34	C10	28
34	C10	29
34	C10	30
34	C10	31
34	C10	32
34	C10	33
34	C10	34
34	C10	35
34	C10	36
34	C10	37
34	C10	38
34	C10	39
34	C10	40
34	C10	41
34	C10	42
34	C10	43
34	C10	44
34	C10	45
35	C11	1
35	C11	2
35	C11	3
35	C11	4
35	C11	5
35	C11	6
35	C11	7
35	C11	8
35	C11	9
35	C11	10
35	C11	11
35	C11	12
35	C11	13
35	C11	14
35	C11	15
35	C11	16
35	C11	17
35	C11	18
35	C11	19
35	C11	20
35	C11	21
35	C11	22
35	C11	23
35	C11	24
35	C11	25
35	C11	26
35	C11	27
35	C11	28
35	C11	29
35	C11	30
35	C11	31
35	C11	32
35	C11	33
35	C11	34
35	C11	35
35	C11	36
35	C11	37
35	C11	38
35	C11	39
35	C11	40
35	C11	41
35	C11	42
35	C11	43
35	C11	44
35	C11	45
36	C12	1
36	C12	2
36	C12	3
36	C12	4
36	C12	5
36	C12	6
36	C12	7
36	C12	8
36	C12	9
36	C12	10
36	C12	11
36	C12	12
36	C12	13
36	C12	14
36	C12	15
36	C12	16
36	C12	17
36	C12	18
36	C12	19
36	C12	20
36	C12	21
36	C12	22
36	C12	23
36	C12	24
36	C12	25
36	C12	26
36	C12	27
36	C12	28
36	C12	29
36	C12	30
36	C12	31
36	C12	32
36	C12	33
36	C12	34
36	C12	35
36	C12	36
36	C12	37
36	C12	38
36	C12	39
36	C12	40
36	C12	41
36	C12	42
36	C12	43
36	C12	44
36	C12	45
37	D1	1	ILAV (HRP0)	0.0217906	0.000864463
37	D1	2	ILAV (HRP0)	0.0215331	0.00067907
37	D1	3	ILAV (HRP0)	0.0212387	0.000456725
37	D1	4	ILAV (HRP0)	0.0211708	0.00046088
37	D1	5	ILAV (HRP0)	0.0208346	0.000196765
37	D1	6	ILAV (HRP0)	0.0201529	-0.000412915
37	D1	7	ILAV (HRP0)	0.0199154	-0.00057835
37	D1	8	ILAV (HRP0)	0.0200401	-0.000381551
37	D1	9	ILAV (HRP0)	0.0202292	-0.000120327
37	D1	10	ILAV (HRP0)	0.020269	-8.45904e-06
37	D1	11	ILAV (HRP0)	0.0201731	-3.23128e-05
37	D1	12	ILAV (HRP0)	0.0200184	-0.000114976
37	D1	13	ILAV (HRP0)	0.0198087	-0.000252589
37	D1	14	ILAV (HRP0)	0.0197809	-0.00020832
37	D1	15	ILAV (HRP0)	0.0201552	0.000238058
37	D1	16	ILAV (HRP0)	0.0202635	0.00041849
37	D1	17	ILAV (HRP0)	0.0201557	0.000382727
37	D1	18	ILAV (HRP0)	0.0196578	-4.30746e-05
37	D1	19	ILAV (HRP0)	0.0195841	-4.4707e-05
37	D1	20	ILAV (HRP0)	0.0199568	0.000400016
37	D1	21	ILAV (HRP0)	0.0198319	0.000347248
37	D1	22	ILAV (HRP0)	0.0191932	-0.000219375
37	D1	23	ILAV (HRP0)	0.0188566	-0.000483953
37	D1	24	ILAV (HRP0)	0.0188606	-0.000407807
37	D1	25	ILAV (HRP0)	0.0190741	-0.000122313
37	D1	26	ILAV (HRP0)	0.0192063	8.19962e-05
37	D1	27	ILAV (HRP0)	0.0191546	0.00010239
37	D1	28	ILAV (HRP0)	0.0191304	0.000150263
37	D1	29	ILAV (HRP0)	0.0194159	0.000507819
37	D1	30	ILAV (HRP0)	0.0196532	0.000817157
37	D1	31	ILAV (HRP0)	0.0197907	0.00102681
37	D1	32	ILAV (HRP0)	0.019958	0.00126616
37	D1	33	ILAV (HRP0)	0.0204129	0.00179317
37	D1	34	ILAV (HRP0)	0.0205823	0.00203463
37	D1	35	ILAV (HRP0)	0.0217371	0.00326149
37	D1	36	ILAV (HRP0)	0.0241539	0.00575034
37	D1	37	ILAV (HRP0)	0.0267415	0.00841007
37	D1	38	ILAV (HRP0)	0.0308209	0.0125615
37	D1	39	ILAV (HRP0)	0.0363004	0.0181131
37	D1	40	ILAV (HRP0)	0.0435918	0.0254766
37	D1	41	ILAV (HRP0)	0.0509467	0.0329035
37	D1	42	ILAV (HRP0)	0.0586737	0.0407026
37	D1	43	ILAV (HRP0)	0.0666755	0.0487764
37	D1	44	ILAV (HRP0)	0.0748038	0.0569769
37	D1	45	ILAV (HRP0)	0.0818474	0.0640926
38	D2	1	ILAV (HRP0)	0.0260769	0.000207601
38	D2	2	ILAV (HRP0)	0.0259912	0.000209465
38	D2	3	ILAV (HRP0)	0.0255888	-0.000105384
38	D2	4	ILAV (HRP0)	0.0254797	-0.000126902
38	D2	5	ILAV (HRP0)	0.0258279	0.000308839
38	D2	6	ILAV (HRP0)	0.0254968	6.52602e-05
38	D2	7	ILAV (HRP0)	0.0251936	-0.000150412
38	D2	8	ILAV (HRP0)	0.0251316	-0.000124869
38	D2	9	ILAV (HRP0)	0.0252205	5.16255e-05
38	D2	10	ILAV (HRP0)	0.0253673	0.000286037
38	D2	11	ILAV (HRP0)	0.0253315	0.000337758
38	D2	12	ILAV (HRP0)	0.0250876	0.000181362
38	D2	13	ILAV (HRP0)	0.0245746	-0.000244044
38	D2	14	ILAV (HRP0)	0.0244136	-0.000317455
38	D2	15	ILAV (HRP0)	0.024479	-0.00016454
38	D2	16	ILAV (HRP0)	0.024738	0.000182
38	D2	17	ILAV (HRP0)	0.0247254	0.000256995
38	D2	18	ILAV (HRP0)	0.0240327	-0.000348158
38	D2	19	ILAV (HRP0)	0.0238035	-0.000489778
38	D2	20	ILAV (HRP0)	0.0238175	-0.000388283
38	D2	21	ILAV (HRP0)	0.0240564	-6.1825e-05
38	D2	22	ILAV (HRP0)	0.0244575	0.000426884
38	D2	23	ILAV (HRP0)	0.024368	0.000424888
38	D2	24	ILAV (HRP0)	0.0242756	0.000420058
38	D2	25	ILAV (HRP0)	0.0242307	0.000462714
38	D2	26	ILAV (HRP0)	0.0241451	0.000464727
38	D2	27	ILAV (HRP0)	0.0240728	0.00047991
38	D2	28	ILAV (HRP0)	0.024043	0.000537739
38	D2	29	ILAV (HRP0)	0.0241415	0.000723789
38	D2	30	ILAV (HRP0)	0.0244905	0.00116029
38	D2	31	ILAV (HRP0)	0.0247366	0.00149402
38	D2	32	ILAV (HRP0)	0.0248176	0.00166258
38	D2	33	ILAV (HRP0)	0.0252827	0.00221524
38	D2	34	ILAV (HRP0)	0.0256474	0.00266747
38	D2	35	ILAV (HRP0)	0.0276789	0.00478652
38	D2	36	ILAV (HRP0)	0.030714	0.00790916
38	D2	37	ILAV (HRP0)	0.035	0.0122827
38	D2	38	ILAV (HRP0)	0.0407396	0.0181099
38	D2	39	ILAV (HRP0)	0.0472012	0.024659
38	D2	40	ILAV (HRP0)	0.055087	0.0326324
38	D2	41	ILAV (HRP0)	0.0627748	0.0404077
38	D2	42	ILAV (HRP0)	0.0703502	0.0480707
38	D2	43	ILAV (HRP0)	0.0785066	0.0563146
38	D2	44	ILAV (HRP0)	0.0871005	0.0649962
38	D2	45	ILAV (HRP0)	0.0941532	0.0721364
39	D3	1	ILAV (HRP0)	0.0287906	0.000904821
39	D3	2	ILAV (HRP0)	0.0286458	0.000852793
39	D3	3	ILAV (HRP0)	0.0281767	0.000476573
39	D3	4	ILAV (HRP0)	0.0279332	0.000325884
39	D3	5	ILAV (HRP0)	0.0278375	0.000323009
39	D3	6	ILAV (HRP0)	0.0273704	-5.12643e-05
39	D3	7	ILAV (HRP0)	0.0268065	-0.000522388
39	D3	8	ILAV (HRP0)	0.0266878	-0.000548242
39	D3	9	ILAV (HRP0)	0.0271178	-2.54845e-05
39	D3	10	ILAV (HRP0)	0.0273425	0.000292084
39	D3	11	ILAV (HRP0)	0.0266411	-0.000316566
39	D3	12	ILAV (HRP0)	0.0264172	-0.000447578
39	D3	13	ILAV (HRP0)	0.0266583	-0.0001137
39	D3	14	ILAV (HRP0)	0.0269125	0.000233332
39	D3	15	ILAV (HRP0)	0.0266671	8.07846e-05
39	D3	16	ILAV (HRP0)	0.0265157	2.21196e-05
39	D3	17	ILAV (HRP0)	0.0265065	0.000105729
39	D3	18	ILAV (HRP0)	0.0263074	-5.266e-07
39	D3	19	ILAV (HRP0)	0.0261071	-0.000107954
39	D3	20	ILAV (HRP0)	0.0258259	-0.000296399
39	D3	21	ILAV (HRP0)	0.0258816	-0.000147885
39	D3	22	ILAV (HRP0)	0.0263553	0.000418671
39	D3	23	ILAV (HRP0)	0.0261436	0.000299799
39	D3	24	ILAV (HRP0)	0.0259843	0.000233261
39	D3	25	ILAV (HRP0)	0.0260533	0.000395135
39	D3	26	ILAV (HRP0)	0.0260189	0.000453487
39	D3	27	ILAV (HRP0)	0.0261418	0.000669212
39	D3	28	ILAV (HRP0)	0.0261253	0.000745581
39	D3	29	ILAV (HRP0)	0.0261068	0.000819883
39	D3	30	ILAV (HRP0)	0.0261876	0.000993527
39	D3	31	ILAV (HRP0)	0.0264569	0.00135558
39	D3	32	ILAV (HRP0)	0.0265507	0.00154222
39	D3	33	ILAV (HRP0)	0.0269609	0.00204521
39	D3	34	ILAV (HRP0)	0.0281531	0.00333023
39	D3	35	ILAV (HRP0)	0.0301869	0.00545684
39	D3	36	ILAV (HRP0)	0.0329425	0.00830528
39	D3	37	ILAV (HRP0)	0.0374974	0.012953
39	D3	38	ILAV (HRP0)	0.0434139	0.0189623
39	D3	39	ILAV (HRP0)	0.0494262	0.0250675
39	D3	40	ILAV (HRP0)	0.0570771	0.0328112
39	D3	41	ILAV (HRP0)	0.0655066	0.0413334
39	D3	42	ILAV (HRP0)	0.0734712	0.0493909
39	D3	43	ILAV (HRP0)	0.0814982	0.0575107
39	D3	44	ILAV (HRP0)	0.0896059	0.0657112
39	D3	45	ILAV (HRP0)	0.0963712	0.0725694
40	D4	1
40	D4	2
40	D4	3
40	D4	4
40	D4	5
40	D4	6
40	D4	7
40	D4	8
40	D4	9
40	D4	10
40	D4	11
40	D4	12
40	D4	13
40	D4	14
40	D4	15
40	D4	16
40	D4	17
40	D4	18
40	D4	19
40	D4	20
40	D4	21
40	D4	22
40	D4	23
40	D4	24
40	D4	25
40	D4	26
40	D4	27
40	D4	28
40	D4	29
40	D4	30
40	D4	31
40	D4	32
40	D4	33
40	D4	34
40	D4	35
40	D4	36
40	D4	37
40	D4	38
40	D4	39
40	D4	40
40	D4	41
40	D4	42
40	D4	43
40	D4	44
40	D4	45
41	D5	1
41	D5	2
41	D5	3
41	D5	4
41	D5	5
41	D5	6
41	D5	7
41	D5	8
41	D5	9
41	D5	10
41	D5	11
41	D5	12
41	D5	13
41	D5	14
41	D5	15
41	D5	16
41	D5	17
41	D5	18
41	D5	19
41	D5	20
41	D5	21
41	D5	22
41	D5	23
41	D5	24
41	D5	25
41	D5	26
41	D5	27
41	D5	28
41	D5	29
41	D5	30
41	D5	31
41	D5	32
41	D5	33
41	D5	34
41	D5	35
41	D5	36
41	D5	37
41	D5	38
41	D5	39
41	D5	40
41	D5	41
41	D5	42
41	D5	43
41	D5	44
41	D5	45
42	D6	1
42	D6	2
42	D6	3
42	D6	4
42	D6	5
42	D6	6
42	D6	7
42	D6	8
42	D6	9
42	D6	10
42	D6	11
42	D6	12
42	D6	13
42	D6	14
42	D6	15
42	D6	16
42	D6	17
42	D6	18
42	D6	19
42	D6	20
42	D6	21
42	D6	22
42	D6	23
42	D6	24
42	D6	25
42	D6	26
42	D6	27
42	D6	28
42	D6	29
42	D6	30
42	D6	31
42	D6	32
42	D6	33
42	D6	34
42	D6	35
42	D6	36
42	D6	37
42	D6	38
42	D6	39
42	D6	40
42	D6	41
42	D6	42
42	D6	43
42	D6	44
42	D6	45
43	D7	1
43	D7	2
43	D7	3
43	D7	4
43	D7	5
43	D7	6
43	D7	7
43	D7	8
43	D7	9
43	D7	10
43	D7	11
43	D7	12
43	D7	13
43	D7	14
43	D7	15
43	D7	16
43	D7	17
43	D7	18
43	D7	19
43	D7	20
43	D7	21
43	D7	22
43	D7	23
43	D7	24
43	D7	25
43	D7	26
43	D7	27
43	D7	28
43	D7	29
43	D7	30
43	D7	31
43	D7	32
43	D7	33
43	D7	34
43	D7	35
43	D7	36
43	D7	37
43	D7	38
43	D7	39
43	D7	40
43	D7	41
43	D7	42
43	D7	43
43	D7	44
43	D7	45
44	D8	1
44	D8	2
44	D8	3
44	D8	4
44	D8	5
44	D8	6
44	D8	7
44	D8	8
44	D8	9
44	D8	10
44	D8	11
44	D8	12
44	D8	13
44	D8	14
44	D8	15
44	D8	16
44	D8	17
44	D8	18
44	D8	19
44	D8	20
44	D8	21
44	D8	22
44	D8	23
44	D8	24
44	D8	25
44	D8	26
44	D8	27
[truncated: 2,358 more rows]

## Sheet: Results
Block Type	96-Well 0.2-mL Block
Calibration Background is expired	No
Calibration Background performed on	06-07-2022
Calibration Pure Dye CY5 is expired	No
Calibration Pure Dye CY5 performed on	08-15-2022
Calibration Pure Dye FAM is expired	No
Calibration Pure Dye FAM performed on	06-07-2022
Calibration Pure Dye NED is expired	No
Calibration Pure Dye NED performed on	08-15-2022
Calibration Pure Dye ROX is expired	No
Calibration Pure Dye ROX performed on	06-07-2022
Calibration Pure Dye SYBR is expired	No
Calibration Pure Dye SYBR performed on	06-07-2022
Calibration Pure Dye TAMRA is expired	No
Calibration Pure Dye TAMRA performed on	08-15-2022
Calibration Pure Dye VIC is expired	No
Calibration Pure Dye VIC performed on	06-07-2022
Calibration ROI is expired	No
Calibration ROI performed on	06-07-2022
Calibration Uniformity is expired	No
Calibration Uniformity performed on	06-07-2022
Chemistry	TAQMAN
Date Created	2023-04-18 00:59:51 AM CEST
Experiment Barcode
Experiment File Name	D:\Applied Biosystems\QuantStudio Design & Analysis Software\User Files\experiments\Marianne\Smittekontroll\2023-04-17_ILAV_Standard curve_TaqMan.eds
Experiment Name	2023-04-17_ILAV_Standard curve_TaqMan
Experiment Run End Time	2023-04-17 15:24:41 PM CEST
Experiment Type	Standard Curve
Instrument Name	QS5-SINTEF
Instrument Serial Number	272523937
Instrument Type	QuantStudio™ 5 System
Passive Reference	ROX
Post-read Stage/Step
Pre-read Stage/Step
Quantification Cycle Method	Ct
Signal Smoothing On	true
Stage/ Cycle where Ct Analysis is performed	Stage2, Step2
Well	Well Position	Omit	Sample Name	Target Name	Task	Reporter	Quencher	CT	Ct Mean	Ct SD	Quantity	Quantity Mean	Quantity SD	Y-Intercept	R(superscript 2)	Slope	Efficiency	Automatic Ct Threshold	Ct Threshold	Automatic Baseline	Baseline Start	Baseline End	Amp Status	Comments	EXPFAIL	HIGHSD	NOAMP
1	A1	false	ILAV cDNA 0,1ng/µL	ILAV (HRP0)	STANDARD	VIC	NFQ-MGB	30.4459	30.4748	0.0372093	0.1			27.0083	0.9743	-3.2753	101.983	false	0.01	false	3	23	Amp		N	N	N
2	A2	false	ILAV cDNA 0,1ng/µL	ILAV (HRP0)	STANDARD	VIC	NFQ-MGB	30.4618	30.4748	0.0372093	0.1			27.0083	0.9743	-3.2753	101.983	false	0.01	false	3	23	Amp		N	N	N
3	A3	false	ILAV cDNA 0,1ng/µL	ILAV (HRP0)	STANDARD	VIC	NFQ-MGB	30.5168	30.4748	0.0372093	0.1			27.0083	0.9743	-3.2753	101.983	false	0.01	false	3	23	Amp		N	N	N
13	B1	false	ILAV cDNA 0,02ng/µL	ILAV (HRP0)	STANDARD	VIC	NFQ-MGB	32.4568	32.5785	0.201022	0.02			27.0083	0.9743	-3.2753	101.983	false	0.01	false	3	23	Amp		N	N	N
14	B2	false	ILAV cDNA 0,02ng/µL	ILAV (HRP0)	STANDARD	VIC	NFQ-MGB	32.8106	32.5785	0.201022	0.02			27.0083	0.9743	-3.2753	101.983	false	0.01	false	3	23	Amp		N	N	N
15	B3	false	ILAV cDNA 0,02ng/µL	ILAV (HRP0)	STANDARD	VIC	NFQ-MGB	32.4683	32.5785	0.201022	0.02			27.0083	0.9743	-3.2753	101.983	false	0.01	false	3	23	Amp		N	N	N
25	C1	false	ILAV cDNA 0,004ng/µL	ILAV (HRP0)	STANDARD	VIC	NFQ-MGB	34.6776	34.6736	0.0147232	0.004			27.0083	0.9743	-3.2753	101.983	false	0.01	false	3	23	Amp		N	N	N
26	C2	false	ILAV cDNA 0,004ng/µL	ILAV (HRP0)	STANDARD	VIC	NFQ-MGB	34.6858	34.6736	0.0147232	0.004			27.0083	0.9743	-3.2753	101.983	false	0.01	false	3	23	Amp		N	N	N
27	C3	false	ILAV cDNA 0,004ng/µL	ILAV (HRP0)	STANDARD	VIC	NFQ-MGB	34.6572	34.6736	0.0147232	0.004			27.0083	0.9743	-3.2753	101.983	false	0.01	false	3	23	Amp		N	N	N
37	D1	false	ILAV cDNA 0,0008ng/µL	ILAV (HRP0)	STANDARD	VIC	NFQ-MGB	37.4118	36.749	0.57965	0.0008			27.0083	0.9743	-3.2753	101.983	false	0.01	false	3	23	Amp		N	Y	N
38	D2	false	ILAV cDNA 0,0008ng/µL	ILAV (HRP0)	STANDARD	VIC	NFQ-MGB	36.4979	36.749	0.57965	0.0008			27.0083	0.9743	-3.2753	101.983	false	0.01	false	3	23	Amp		N	Y	N
39	D3	false	ILAV cDNA 0,0008ng/µL	ILAV (HRP0)	STANDARD	VIC	NFQ-MGB	36.3372	36.749	0.57965	0.0008			27.0083	0.9743	-3.2753	101.983	false	0.01	false	3	23	Amp		N	Y	N
49	E1	false	ILAV cDNA 0,00016ng/µL	ILAV (HRP0)	STANDARD	VIC	NFQ-MGB	40.81	39.8365	1.04961	0.00016			27.0083	0.9743	-3.2753	101.983	false	0.01	false	3	23	Amp		N	Y	N
50	E2	false	ILAV cDNA 0,00016ng/µL	ILAV (HRP0)	STANDARD	VIC	NFQ-MGB	38.7245	39.8365	1.04961	0.00016			27.0083	0.9743	-3.2753	101.983	false	0.01	false	3	23	Amp		N	Y	N
51	E3	false	ILAV cDNA 0,00016ng/µL	ILAV (HRP0)	STANDARD	VIC	NFQ-MGB	39.975	39.8365	1.04961	0.00016			27.0083	0.9743	-3.2753	101.983	false	0.01	false	3	23	Amp		N	Y	N
61	F1	false	ILAV cDNA 1:20	ILAV (HRP0)	UNKNOWN	VIC	NFQ-MGB	32.0611	32.0611		0.0286608	0.0286608		27.0083	0.9743	-3.2753	101.983	false	0.01	false	3	23	Amp		N	N	N
62	F2	false	ILAV cDNA 1:10	ILAV (HRP0)	UNKNOWN	VIC	NFQ-MGB	31.0345	31.0345		0.0589828	0.0589828		27.0083	0.9743	-3.2753	101.983	false	0.01	false	3	23	Amp		N	N	N
63	F3	false	LiMo 0,08ng/µL	ILAV (HRP0)	UNKNOWN	VIC	NFQ-MGB	Undetermined						27.0083	0.9743	-3.2753	101.983	false	0.01	false	3	23	No Amp		Y	N	Y
73	G1	false	Mock 0,01ng/µL	ILAV (HRP0)	UNKNOWN	VIC	NFQ-MGB	Undetermined						27.0083	0.9743	-3.2753	101.983	false	0.01	false	3	23	No Amp		Y	N	Y
74	G2	false	T.ovolyticum 0,231ng/	ILAV (HRP0)	UNKNOWN	VIC	NFQ-MGB	Undetermined						27.0083	0.9743	-3.2753	101.983	false	0.01	false	3	23	No Amp		Y	N	Y
75	G3	false	F.psychrophilum 0,08ng/µL	ILAV (HRP0)	UNKNOWN	VIC	NFQ-MGB	Undetermined						27.0083	0.9743	-3.2753	101.983	false	0.01	false	3	23	No Amp		Y	N	Y
85	H1	false	NTC	ILAV (HRP0)	UNKNOWN	VIC	NFQ-MGB	Undetermined						27.0083	0.9743	-3.2753	101.983	false	0.01	false	3	23	No Amp		Y	N	Y
86	H2	false	NTC	ILAV (HRP0)	UNKNOWN	VIC	NFQ-MGB	Undetermined						27.0083	0.9743	-3.2753	101.983	false	0.01	false	3	23	No Amp		Y	N	Y
87	H3	false	NTC	ILAV (HRP0)	UNKNOWN	VIC	NFQ-MGB	Undetermined						27.0083	0.9743	-3.2753	101.983	false	0.01	false	3	23	No Amp		Y	N	Y
